1     **Predicted Impact of the Viral Mutational Landscape on the**  
2                     **Cytotoxic Response against SARS-CoV-2**

3     Anna Foix<sup>a</sup>, Daniel López<sup>b</sup>, Michael J. McConnell<sup>c</sup> and Antonio J. Martín-Galiano<sup>c\*</sup>

4

5     <sup>a</sup> European Bioinformatic Institute, European Molecular Biology Laboratory. Hinxton.  
6     United Kingdom. UK.

7     <sup>b</sup> Presentation and Immune Regulation Unit, Centro Nacional de Microbiología,  
8     Instituto de Salud Carlos III. Majadahonda 28220. Spain.

9     <sup>c</sup> Laboratory of Intrahospital Infections, Centro Nacional de Microbiología, Instituto de  
10    Salud Carlos III. Majadahonda 28220. Spain.

11

12    \*Corresponding author: [mgaliano@isciii.es](mailto:mgaliano@isciii.es)

13

14 **ABSTRACT**

15 **The massive assessment of immune evasion due to viral mutations that potentially increase**  
16 **COVID-19 susceptibility can be computationally facilitated. The adaptive cytotoxic T**  
17 **response is critical during primary infection and the generation of long-term protection.**  
18 **Potential epitopes in the SARS-CoV-2 proteome were predicted for 2,915 human alleles of**  
19 **71 HLA class I families. Allele families showed extreme differences in number of**  
20 **recognized epitopes, underscoring genetic variability of protective capacity between**  
21 **humans. Up to 1,222 epitopes were associated with any of the twelve supertypes, that is,**  
22 **allele clusters covering 90% population. Among them, the B27 supertype showed the**  
23 **lowest number of epitopes. Epitope escape mutations identified in ~118,000 NCBI isolates**  
24 **mainly involved non-conservative substitutions at the second and C-terminal position of**  
25 **the ligand core, or total ligand removal by large recurrent deletions. Escape mutations**  
26 **affected 47% of supertype epitopes, which in 21% of cases concerned isolates from two or**  
27 **more sub-continental areas. Some of these changes were coupled, but never surpassed**  
28 **15% evaded epitopes for the same supertype in the same isolate, except for B27, which**  
29 **reached up to 33%. In contrast to most supertypes, eight particular allele families mostly**  
30 **contained alleles with few SARS-CoV-2 ligands. Isolates harboring cytotoxic escape**  
31 **mutations for these families co-existed geographically within sub-Saharan and Asian**  
32 **populations enriched in these alleles. Collectively, these data indicate that independent**  
33 **escape mutation events have already occurred for half of HLA class I supertype epitopes.**  
34 **However, it is presently unlikely that, overall, it poses a threat to the global population. In**  
35 **contrast, single and double mutations for susceptible alleles may be associated with viral**  
36 **selective pressure and alarming local outbreaks. This study highlights the automated**  
37 **integration of genomic, geographical and immunoinformatic information for surveillance**  
38 **of SARS-CoV-2 variants potentially affecting the population as a whole, as well as**  
39 **minority subpopulations.**

40

41 **AUTHOR SUMMARY**

42 The cytotoxic T response, a type of immune response dependent upon an individual's genetics  
43 that does not require antibodies, is critical for neutralizing SARS-CoV-2 infection. The potential  
44 bypass of the cytotoxic T response by mutations acquired by the virus after one year of the  
45 pandemic is therefore of maximal concern. We have approached the complexity of human  
46 variability and more than 100.000 viral genomes in this respect using a computational strategy.  
47 We have detected numerous mutations in these genomes that mask some viral regions involved  
48 in the cytotoxic response. However, the accumulation of these changes in independent isolates  
49 is still too low to threaten the global human population. In contrast, our protocol has identified  
50 mutations that may be relevant for specific populations and minorities with cytotoxic genetic  
51 backgrounds susceptible to SARS-CoV-2 infection. Some viral variants co-existed in the same  
52 country with these human communities which warrants deeper surveillance in these cases to  
53 prevent local outbreaks. Our study support the integration of massive data of different natures in  
54 the surveillance of viral pandemics.

55

## 56 **Introduction**

57           Mutations in the severe acute respiratory syndrome coronavirus 2 (SARS-CoV-2)  
58 leading to increased susceptibility are of extreme concern. Given the slow pace of vaccination in  
59 some geographic regions, enhanced primary infection by strains that evade immune detection  
60 might worsen the significant health and socioeconomic burden caused by the COVID-19  
61 pandemic.

62           Long term protection from viral infection relies on a competent adaptive response.  
63 Adaptive protection includes the coordinated activation and memory of three adaptive response  
64 compartments. These branches consist of the humoral response, driven by antibodies  
65 synthesized by B cells, and the two types of cellular response, driven by CD8<sup>+</sup> and CD4<sup>+</sup>  
66 lymphocytes that recognize viral peptides bound to human leukocyte antigen (HLA) class I and  
67 II molecules, respectively (1). Antibodies neutralize the virus, for example, by specific binding  
68 to the spike protein and inhibit binding to the ACE2 receptor expressed in the lung (2). CD8<sup>+</sup>, or  
69 cytotoxic, T lymphocytes directly kill SARS-CoV-2 infected cells through the secretion of pore-  
70 forming proteases and the induction of programmed cell death (3). Finally, CD4<sup>+</sup>, T helper  
71 lymphocytes, play a pivotal stimulatory role for both antibody-led and cytotoxic activities. An  
72 effective cellular response is associated with prompt and efficient protection during primary and  
73 successive SARS infections (4–6). Moreover, the cellular and humoral responses are long-  
74 lasting (7) and elicit immunoprotective memory (8,9).

75           Naïve cytotoxic lymphocytes are stimulated through the presentation of specific  
76 proteolyzed fragments of antigens, or epitopes, bound to HLA class I molecules in the  
77 membrane of infected cells. Some peptides of approximately nine residues are generated by  
78 cleavage of intracellular pathogen proteins and bound in the endoplasmic reticulum to the apical  
79 antigenic groove of the monomeric chain of HLA class I. Once in the membrane, these ligands  
80 can be recognized by the T-cell receptor of T CD8<sup>+</sup> lymphocytes that start the maturation  
81 process. After activation and division of a sufficient subsets of mature CD8<sup>+</sup> T cells, the subject  
82 may be protected against the particular virus as SARS-CoV-2 at a cellular level (3).

83           Severe COVID-19 outcomes have been associated with aging and co-morbidities such  
84 as hypertension and diabetes mellitus (10). However, how host genetic factors influence the  
85 disease is still largely unknown. In this respect, the adaptive cellular response is strongly  
86 influenced by host genetics. Notably, HLA class I genes are among the most multiple and  
87 variable genes in humans. The HLA class I system consists of three loci for which over 17,000  
88 alleles have been reported (11). These alleles are further grouped into phylogenetic families and,  
89 some of them, into supertypes that shared comparable ligands (12). Overall, this huge allelic  
90 diversity provides the human species with an enormous capacity to detect different antigens  
91 from virtually any pathogen.

92           HLA class I epitope pool screenings with SARS-CoV-2 sequences have been carried  
93 out for specific countries (13–15). This kind of experimental information is stored in  
94 repositories like the Immune Epitope Database and Analysis Resource (IEDB) (16), which  
95 allows for the global analysis of potential mutation-evasion events. Certain HLA alleles have  
96 been associated with permissiveness to SARS-CoV-2 infection, such as B\*44 and C\*01 families  
97 in Italy (17), and B\*15:27 and C\*07:29 in China (18). However, these data still do not evenly  
98 represent genetic differences in susceptibility at the global population level. Since analyzing  
99 thousands of HLA alleles is experimentally unrealistic (19), the confines of the human SARS-  
100 CoV-2 cytotoxic ligandome can be explored by *bona fide* computation approaches in a neutral  
101 manner. For instance, Nguyen *et al.* identified HLA-B\*46:01 as the less efficient allele for  
102 presenting SARS-CoV-2 epitopes among 145 alleles by using an immunoinformatic approach  
103 (20).

104           Widespread infection with SARS-CoV-2 at the global level provides the virus with  
105 great opportunity to explore the mutational space. Some of these changes may be selected based  
106 on immunological evasive advantages. In this respect, how the genetic variability of the virus  
107 can affect individuals carrying different HLA class I alleles is currently unknown. Viral  
108 mutations that dramatically decrease binding affinity of epitopes to HLA class I molecules can  
109 act as escape mutants and alter the cellular immunity, with important implications for clinical  
110 evolution of the infection (21). How many and which mutations an isolate must acquire in order

111 to evade the adaptive cytotoxic responses of the general population remains an open question.  
112 Such emerging capacity to bypass the cytotoxic response would presumably not follow a  
113 categorical binary pattern but a gradient dependant on underlying individual genetics.

114 The goal of this study is two-fold. First, we have interrogated how SARS-CoV-2  
115 mutations can affect predicted HLA class I binding at the global population level, and second,  
116 how existing mutations influence the response of specific sub-populations that harbor alleles  
117 with few SARS-CoV-2 epitopes. For that, we have taken advantage of the strength of  
118 computational methods to design a protocol that generates and operates on formatted data. This  
119 allowed us to conduct an exhaustive analysis that involved over 2,900 human HLA class I  
120 alleles and ~118,000 viral genomes. The knowledge acquired here may help to understand the  
121 current status of the human cytotoxic defense in the context of the pandemic and to promptly  
122 identify emerging strains that require close monitoring.

123

## 124 **Results**

### 125 **Predicted vs validated SARS-CoV-2 HLA class I epitopes**

126 To obtain a more complete insight of the cellular cytotoxic response to SARS-CoV-2, HLA  
127 class I epitopes from the SARS-CoV-2 reference proteome were predicted by the universal  
128 netMHCpan 4.1 EL algorithm (22). These included all medium-strong peptide binders for 2,915  
129 human alleles grouped into 71 families of the HLA-A (21 families, 886 alleles), HLA-B (36  
130 families, 1412 alleles), HLA-C (14 families, 617 alleles) loci available in this software. The  
131 predicted full SARS-CoV-2 ligandome for HLA class I reached 5,224 independent epitopes.

132 Data complexity reduction by clustering alleles into families can cause some  
133 information loss. However, the degree of intra-family coherence, that is, the percentage of  
134 matching epitopes between two alleles of the same family with respect to the total predicted by  
135 both alleles, reached  $61.3 \pm 19.2\%$  (mean  $\pm$  SD). In contrast, the inter-family coherence, that is,  
136 the average matching epitopes after all-against-all family comparison), was only  $3.0 \pm 1.6\%$ .

137 This supports that, despite the existence of intra-family differences, the allele family cluster  
138 stratum is acceptable for a global view of HLA epitopes.

139 Families showed a drastic difference in the number of predicted epitopes (Fig. 1A).  
140 Globally, families of A and C loci showed higher values than B loci families. In particular,  
141 A\*01, A\*23, A\*24, C\*12 and C\*14 families surpassed 300 epitopes on average, whereas B\*46,  
142 B\*82 and B\*83 were below five. Twenty-six alleles, several from the B\*46 family, were not  
143 associated with any predicted epitope. These computational predictions are in line with  
144 antecedent observations concerning great differences between HLA class I alleles in the  
145 response to the SARS-CoV-2 reference strain (18,20). Some families were linked to exclusive  
146 epitope pools but others shared overlapping SARS-CoV-2 ligandomes (Fig. 1B).

147 All viral proteins theoretically generated HLA class I epitopes. On average, 1.19  
148 epitopes per allele family (those identified for  $\geq 50\%$  alleles in the family) and 100 residues  
149 were identified in the SARS-CoV-2 proteome. Among polypeptides with  $\geq 75$  residues, the M  
150 protein carried higher (1.41 epitopes per family and 100 residues) and N lower (0.71) epitope  
151 densities, respectively.

152 Epitope predictions were compared to 760 experimentally validated 8-12mer epitopes  
153 for HLA class I included in the IEDB dataset. Up to 90% of validated epitopes perfectly  
154 matched predicted epitopes, for at least one allele, at the stringent thresholds applied. There was  
155 high correlation ( $r^2 = 0.87$ , polynomial fit) between the number of predicted and validated  
156 epitopes for the allele (Fig. 2A). However, several alleles from the A\*02 family were  
157 comparatively over-represented while B\*27 and B\*39 alleles were under-represented in the  
158 validated dataset. Differences for sequence and number of validated ligand datasets were  
159 evident between whole families (Fig. 2B). Globally, the ratio between validated and predicted  
160 epitopes was significantly higher for families of the A locus ( $0.35 \pm 0.12$ ) with respect to those  
161 of the B ( $0.31 \pm 0.13$ ,  $P < 0.001$  Student's t-test) and the C ( $0.29 \pm 0.10$ ,  $P < 0.001$ ) loci. Forty-  
162 four alleles from 13 families did not show any validated experimental epitope, a higher number  
163 than allele and families without predicted epitopes. Despite invaluable studies that contributed  
164 data with relatively large and distributed datasets (23), experimental screenings may be slightly

165 biased by the low frequencies of some alleles in the cohorts analyzed. Overall, computational  
 166 and experimental approaches may be complementary and beneficial for the global  
 167 characterization of the SARS-CoV-2 cytotoxic response.

168

### 169 **Supertypes show very different number of SARS-CoV-2 supermotifs**

170 Alleles, from the same or different families, that bind similar epitopes are functionally grouped  
 171 into twelve, so-called, supertypes (12). Supertypes cover >90% of the world population  
 172 regardless of ethnicity. In our dataset, 1,222 (23.4%) of all non-redundant epitopes were able to  
 173 cover  $\geq 50\%$  of the alleles associated with at least one supertype, i.e. are supermotifs (24) (Fig.  
 174 3A, Supplementary Table S2). Moreover, twenty supermotifs covered three or more supertypes  
 175 (Table 1). On average, 11.1 supermotifs were identified per 100 residues of the viral proteome.  
 176 Among ORFs with  $\geq 75$  residues, the M (13.5 supermotifs per 100 residues) and the N (5.0  
 177 supermotifs per 100 residues) proteins showed the highest and the lowest concentration of  
 178 supermotifs, respectively. The number of supertypes was unevenly represented since, for  
 179 instance, the "A01 A24" and "A24" supertypes were associated with >250 supermotifs, while  
 180 others as "A01" or "B07" with around 50 supermotifs, and the "B27" supertype showed only 12  
 181 (Fig. 3B).

182

183 **Table 1. SARS-CoV-2 HLA class I supermotifs involving three or more supertypes.**

| Protein | Supermotif sequence  | % allele supertype coverage |         |         |     |     |     |     |     |     |     |     | Number of covered supertypes |     |
|---------|----------------------|-----------------------------|---------|---------|-----|-----|-----|-----|-----|-----|-----|-----|------------------------------|-----|
|         |                      | A01                         | A01 A03 | A01 A24 | A02 | A03 | A24 | B07 | B08 | B27 | B44 | B58 |                              | B62 |
| ORF1ab  | 5533-VVYRGTTTY-5541  | 76                          |         | 100     |     | 53  |     |     |     |     |     | 72  | 62                           | 5   |
| ORF1ab  | 1582-QVVDMSMTY-1590  | 78                          |         | 100     |     | 52  |     |     |     |     |     |     | 62                           | 4   |
| ORF1ab  | 2273-STNVTIATY-2281  | 80                          |         | 100     |     |     |     |     |     |     |     | 67  | 58                           | 4   |
| ORF1ab  | 4072-VVIPDYNTY-4080  | 82                          |         | 100     |     |     |     |     |     |     |     | 67  | 62                           | 4   |
| ORF1ab  | 4673-KLFDYFKY-4681   | 50                          |         | 100     |     | 67  |     |     |     |     |     |     | 54                           | 4   |
| ORF1ab  | 6154-HSIGFDYVY-6162  | 74                          |         | 100     |     |     |     |     |     |     |     | 61  | 50                           | 4   |
| ORF1ab  | 77-RTAPGHVM-85       |                             | 60      |         |     |     |     |     |     |     |     | 89  | 60                           | 3   |
| ORF1ab  | 110-HVGEIPVAY-118    | 72                          |         | 100     |     |     |     |     |     |     |     |     | 60                           | 3   |
| ORF1ab  | 568-TILDGISQY-576    | 74                          |         | 100     |     |     |     |     |     |     |     |     | 60                           | 3   |
| ORF1ab  | 906-YLFDESCEF-914    |                             |         | 78      | 70  |     |     |     |     |     |     |     | 68                           | 3   |
| ORF1ab  | 1768-VMYMGTLISY-1776 | 52                          |         | 100     |     |     |     |     |     |     |     |     | 62                           | 3   |



|        |                     |    |     |    |    |    |   |
|--------|---------------------|----|-----|----|----|----|---|
| ORF1ab | 1806-MMSAPPAQY-1814 | 62 | 100 |    |    | 62 | 3 |
| ORF1ab | 2876-TTNGDFLHF-2884 | 58 | 78  |    |    | 78 | 3 |
| ORF1ab | 2960-SIIQFPNTY-2968 | 74 | 100 |    |    | 60 | 3 |
| ORF1ab | 3103-GVYSVIYLY-3111 | 70 | 100 | 61 |    |    | 3 |
| ORF1ab | 4533-TLKEILVTY-4541 | 58 | 100 |    |    | 60 | 3 |
| ORF1ab | 5267-QEYADVFLY-5276 |    | 100 | 74 |    | 57 | 3 |
| ORF1ab | 5981-SMMGFKMNY-5989 |    | 100 | 64 |    | 60 | 3 |
| S      | 192-FVFKNIDGY-200   | 72 | 100 |    |    | 52 | 3 |
| S      | 269-YLQPRTFLL-277   |    |     | 88 | 74 | 87 | 3 |

184

## 185 **Recurrent mutations can affect HLA class I epitopes**

186 Calculations performed up to this point have included only the original Wu-han-1 reference  
187 strain. However, viruses are continuously evolving entities where HLA class I ligand  
188 recognition can be dynamically subjected to extensive mutation-selection processes. Key  
189 mutations could produce cytotoxic escape variants by reducing affinity or even deleting HLA  
190 class I ligands and, then, influencing the ability of CD8+ lymphocytes to clear the infection  
191 (25). To assess this possibility, mutations were identified in 117,811 SARS-CoV-2 isolates from  
192 87 countries covering 21 out of the 22 sub-continental areas of the United Nations M49  
193 geoscheme (<https://unstats.un.org/unsd/methodology/m49/>). A total of 1,128,631 genetic  
194 alterations with respect to the Wu-han-1 reference strain were identified. These involved 28,512  
195 unique residue substitutions in 9,723 positions. A total of 78% of unique substitutions were non-  
196 conservative, those concerning distinct amino acid classes (Fig. 4A, left). Up to 26,231  
197 deletions of 1 to 193 residues and 127 insertions, ranging between 1 and 8 residues, were also  
198 detected (Fig. 4B). Substitutions were much more prevalent than deletions (Fig. 4C). In  
199 contrast, deletions affected a higher number of epitopes (Fig. 4C). Nevertheless, the  
200 degeneration of ligand binding is expected to counteract many substitutions and point deletions  
201 affecting epitopes, leading to a negligible effect on the cytotoxic response.

202

203 **There are mutations for most supermotifs but only a fraction causes epitope escape**  
204 **and are geographically distributed**

205 All 1,224 supermotifs carried some type of mutation in least one isolate. Nevertheless, a central  
206 question is to what extent these changes have high impact in the context of the cytotoxic  
207 response of the worldwide population.

208 Mutations were scrutinized using three criteria: recurrence, binding affinity reduction  
209 and geographical dissemination of isolates carrying them. For this, a series of incremental  
210 selective criteria on all the genetic changes observed was applied: (Filter 1) presence of the  
211 mutation in  $\geq 2$  isolates if the mutation was a substitution, or  $\geq 5$  isolates if the mutation was an  
212 insertion or a deletion, since these are more likely to be resultant of sequencing errors; (Filter 2) drastic  
213 reduction of supermotif binding. Changes in the second (P2) and C-terminal (P9 in core  
214 nonamers) positions preferentially perturb binding affinity, in particular when these changes  
215 involve amino acids of different physicochemical classes (non-conservative) (Fig 5A). This can  
216 be explained by residues in these positions intimately interact with the selective B and F pockets  
217 in the groove of the HLA molecule. However, the epitope disturbing capacity of mutations in  
218 these positions is not an exact rule (Fig. 5A). Thus, the actual impact on binding was explicitly  
219 recalculated in the mutated sequence and quantified using recommended thresholds (see  
220 Materials and Methods); and (Filter 3) detection of the mutation in isolates from different M49  
221 world regions.

222 Expectedly, the fraction of escape supermotifs substantially decreased as more selective  
223 criteria were applied (Fig. 5B). Only 22.1% of supermotifs contained mutations that satisfied all  
224 the stringent criteria, that is, show recurrent mutations that cancel the HLA class I binding and  
225 are found in isolates over several sub-continental zones. Such high-impact changes affected  
226 differently to various supertypes. The A03 supertype was more affected with 36.7% while only  
227 3.3% of B08 supertype supermotifs showed escape and disseminated mutations (Fig. 5C, Table  
228 S2). The "Australia and New Zealand" and, in particular, "Northern America" M49 zones  
229 presented isolates with mutations in a substantial part of supermotifs (Fig. 5D).

230 Recurrent mutations may have great relevance if they affect more than one supertype.  
231 Thirty substitutions that disabled binding affinity of universal supermotifs appeared in 70 or  
232 more isolates (Table 2, Supplementary Table S3). Among them, was the W152C change in the

233 spike protein in 3,455 USA isolates, which removed four supermotifs of two supertypes. The  
 234 W6974V (ORF1ab) substitution found in 211 isolates of four M49 areas, destroyed three  
 235 supermotifs of two supertypes. Notably, the P5828 and K6980 (ORF1ab) positions showed two  
 236 different recurrent escape mutations each.

237 Comparatively, insertions played an almost global negligible effect. Only 6965::SKF  
 238 and 6981::KEGQ (ORF1ab) decreased the HLA binding, affected one supermotif and supertype  
 239 each, and were in more than 10 isolates (Table 3).

240 Deletions showed a binary pattern (Table 4 and Supplementary Table S4). On the one  
 241 hand, short deletions ( $\leq 3$  residues) affected many proteome zones and mostly concerned a  
 242 single supermotif. For instance, the predominant  $\Delta 145$  (S protein),  $\Delta 363$  (N protein) and  $\Delta 141$ -  
 243 143 (ORF1ab) deletions were in this group. On the other hand, long recurrent deletions ( $>80$   
 244 residues) removed up to twelve supermotifs from seven supertypes and tended to occur in  
 245 discrete proteome hotspots, namely the 2791-2883 (28-120 of nsp4) and the 6338-6436 (413-  
 246 511 of nsp14A2\_ExonN) regions of ORF1ab.

247

248 **Table 2. Top-30 recurrent supermotif escape substitutions.**

| Protein | Mutation | Number of isolates (number of countries) | M49 areas*       | Escape supermotif(s)** | Affected supertypes |
|---------|----------|------------------------------------------|------------------|------------------------|---------------------|
| S       | W152C    | 3455 (1)                                 | Northern America | 4                      | A01 A24, A24        |
| ORF1ab  | L3606F   | 2986 (49)                                | 18               | 3605-FLYENAFV-3612     | A02                 |
| ORF1ab  | P5828L   | 2147 (6)                                 | 6                | 5827-NPAWRKAVF-5835    | B07                 |
| ORF1ab  | P4619L   | 1023 (5)                                 | 5                | 4618-TPGSGVPV-4626     | B07                 |
| ORF1ab  | L6102F   | 797 (7)                                  | 7                | 6100-KNLSDRVVFV-6109   | A02                 |
| ORF1ab  | V3595G   | 304 (1)                                  | Northern America | 3587-ILTSLLVLV-3595    | A02                 |
| ORF1ab  | L6981Q   | 258 (4)                                  | 4                | 6973-SWNADLYKL-6981    | A24                 |
| ORF1ab  | K2511N   | 251 (7)                                  | 6                | 2511-KTYERHSL-2519     | A01 A03             |
| ORF1ab  | K6980G   | 223 (4)                                  | 4                | 6972-HSWNADLYK-6980    | A03                 |
| ORF1ab  | P5828S   | 214 (5)                                  | 4                | 5827-NPAWRKAVF-5835    | B07                 |
| ORF1ab  | W6974V   | 211 (4)                                  | 4                | 3                      | A24, B58            |
| ORF1ab  | S2625F   | 181 (2)                                  | 2                | 2624-VSLDNVLSF-2633    | B58                 |
| ORF3a   | K16N     | 148 (4)                                  | 4                | 2                      | A03                 |
| ORF1ab  | S2535L   | 147 (5)                                  | 5                | 2534-GSLPINVIVF-2543   | B58                 |
| ORF1ab  | K2200N   | 145 (4)                                  | 4                | 2191-KASMPPTIAK-2200   | A03                 |
| ORF1ab  | L642F    | 124 (3)                                  | 3                | 641-FLRDGWEIV-649      | A02                 |
| ORF1ab  | L2122F   | 108 (1)                                  | Northern America | 2121-TLATHGLAAV-2130   | A02                 |

|        |        |         |                  |                     |              |
|--------|--------|---------|------------------|---------------------|--------------|
| ORF1ab | V627F  | 104 (5) | 3                | 619-TVYEKLPV-627    | A02          |
| S      | K1073N | 100 (3) | 3                | 2                   | A01 A03, A03 |
| ORF1ab | K6464N | 94 (6)  | 6                | 6456-NVAFNVVVK-6464 | A03          |
| S      | W152L  | 91 (6)  | 5                | 151-SWMESEFRV-159   | A24          |
| ORF1ab | K6980S | 83 (2)  | 2                | 6972-HSWNADLYK-6980 | A03          |
| S      | W152R  | 83 (4)  | 4                | 143-VYYHKNNKSW-152  | A24          |
| ORF3a  | K67N   | 79 (4)  | 4                | 59-ASKIITLKK-67     | A03          |
| ORF1ab | K2497N | 75 (5)  | 4                | 2489-YIVDSVTVK-2497 | A03          |
| ORF3a  | Y107H  | 75 (1)  | Northern America | 2                   | A01 A24      |
| ORF1ab | P1659S | 73 (2)  | 2                | 1658-YPQVNGTSL-1667 | B07          |
| ORF3a  | L52F   | 73 (2)  | 2                | 51-ALLAVFQSA-59     | A02          |
| ORF1ab | L446F  | 71 (3)  | 3                | 445-GLNDNLLEIL-454  | A02          |
| ORF1ab | L681F  | 70 (3)  | 3                | 680-KLVNKFLAL-688   | A02          |

249

250 \* If the number of M49 areas is higher than one, the number is given instead.

251 \*\* If the number of supermotifs with escape substitutions is higher than one, the number is  
252 given instead.

253

254 **Table 3. Recurrent supermotif escape insertions.**

| Protein | Insertion  | Number of isolates (number of countries) | M49 areas                        | Escape supermotif(s)                       | Affected supertypes |
|---------|------------|------------------------------------------|----------------------------------|--------------------------------------------|---------------------|
| ORF1ab  | 6965::SKF  | 31 (2)                                   | Northern America, Western Africa | 6958-KLALGGSVAI-6967                       | A02                 |
| ORF1ab  | 6981::KEGQ | 24 (1)                                   | Northern America                 | 6973-SWNADLYKL-6981                        | A24                 |
| ORF1ab  | 6980::EG   | 9 (1)                                    | Northern America                 | 6972-HSWNADLYK-6980<br>6973-SWNADLYKL-6981 | A03<br>A24          |
| ORF1ab  | 6980::G    | 9 (1)                                    | Northern America                 | 6972-HSWNADLYK-6980<br>6973-SWNADLYKL-6981 | A03<br>A24          |

255

256 **Table 4. Top-30 recurrent supermotif escape deletions.**

| Protein | Deletion location (length) | Number of isolates (number of countries) | M49 areas*       | Escape supermotifs** | Affected supertypes*** |
|---------|----------------------------|------------------------------------------|------------------|----------------------|------------------------|
| S       | Δ145 (1)                   | 2766 (24)                                | 16               | 142-GVYYHKNNK-150    | A03                    |
| ORF1ab  | Δ6343-6429 (87)            | 1695 (2)                                 | 2                | 9                    | 5                      |
| N       | Δ363 (1)                   | 833 (1)                                  | Northern America | 355-KHIDAYKTF-363    | A24                    |
| ORF1ab  | Δ6338-6436 (99)            | 774 (8)                                  | 7                | 2                    | A02                    |
| ORF1ab  | Δ6342-6432 (91)            | 705 (3)                                  | 3                | 7                    | 3                      |
| ORF1ab  | Δ6343-6432 (90)            | 493 (2)                                  | 2                | 6                    | A02, A24               |
| ORF1ab  | Δ6343-6431 (89)            | 492 (2)                                  | 2                | 6                    | A02, A24               |

|        |                 |         |                  |                     |          |
|--------|-----------------|---------|------------------|---------------------|----------|
| ORF1ab | Δ141-143 (3)    | 404 (9) | 9                | 135-SYGADLKSF-143   | A24      |
| ORF1ab | Δ6342-6429 (88) | 303 (1) | Northern America | 9                   | 6        |
| ORF1ab | Δ7014-7096 (83) | 298 (4) | 4                | 11                  | 7        |
| ORF1ab | Δ4714 (1)       | 261 (9) | 8                | 4710-STVFPPTSF-4718 | A01      |
| ORF1ab | Δ6341-6432 (92) | 228 (2) | 2                | 6                   | 2        |
| ORF1ab | Δ6345-6429 (85) | 200 (1) | Northern America | 8                   | 5        |
| ORF1ab | Δ2797-2877 (81) | 173 (2) | 2                | 2                   | A03, B44 |
| ORF1ab | Δ6345-6428 (84) | 164 (2) | 2                | 6                   | 3        |
| ORF1ab | Δ2276-2356 (81) | 150 (2) | 2                | 4                   | 4        |
| ORF1ab | Δ6656-6686 (31) | 150 (1) | Northern America | 6669-AMDEFIERY-6677 | A01      |
| ORF1ab | Δ3705-3705 (1)  | 149 (2) | 2                | 3699-TVYDDGARR-3707 | A03      |
| ORF1ab | Δ2796-2877 (82) | 148 (2) | 2                | 3                   | A03, B44 |
| ORF1ab | Δ84-85 (2)      | 129 (8) | 7                | 2                   | 3        |
| ORF1ab | Δ6969-7036 (68) | 126 (4) | 4                | 8                   | 4        |
| ORF1ab | Δ2791-2883 (93) | 108 (5) | 5                | 4                   | 3        |
| ORF1ab | Δ85 (1)         | 107 (3) | 3                | 77-RTAPHGVM-85      | B62      |
| S      | Δ143-144 (2)    | 98 (3)  | 3                | 142-GVYYHKNNK-150   | A03      |
| ORF1ab | Δ768-862 (95)   | 92 (4)  | 4                | 12                  | 6        |
| ORF1ab | Δ2797-2876 (80) | 92 (2)  | 2                | 3                   | 2        |
| ORF1ab | Δ6341-6436 (96) | 88 (1)  | Northern America | 5                   | 4        |
| ORF1ab | Δ6158 (1)       | 84 (2)  | 2                | 6154-HSIGFDYVY-6162 | 4        |
| ORF1ab | Δ6345-6430 (86) | 83 (1)  | Northern America | 7                   | 4        |
| ORF1ab | Δ6956 (1)       | 81 (6)  | 5                | 6954-FIQQLAL-6961   | B08      |

257

258 \* If the number of M49 areas is higher than one, the number is given instead.

259 \*\* If the number of supermotifs with escape deletions is higher than one, the number is given

260 instead.

261 \*\*\* If the number of affected supertypes is higher than two, the number is given instead.

262

### 263 **Only a few supermotif escape mutations coexist in the same isolate**

264 Beyond prevalence, these mutations may show distinct combinatorial preferences for

265 simultaneously co-occurring in the same isolates. This information was utilized to detect nine

266 independent mutation networks of 2-44 mutations. Several supermotif mutations were linked

267 through a few spread mutations acting as hubs: W152C (S protein), L3606F (ORF1ab, L37 in

268 nsp6\_TM) and four long recurrent deletions in the 6342-6432 range (ORF1ab, nsp14A2\_ExonN

269 protein)(Fig. 6).

270 Mutated lineages were also analyzed at the isolate level. Ultimately, isolates enriched in  
271 supermotif escape mutations may evade immune system response and disseminate quickly.  
272 There was a direct relationship between the number of substitutions in an isolate and the number  
273 of supertype alleles altered, which may be mostly attributed to neutral RNA replication errors.  
274 Importantly, 7347 isolates conveyed mutations in  $\geq 5$  supermotifs (Table 5 and Supplementary  
275 Table S5) and in 1027 cases affected  $\geq 5$  superotypes.

276 The origin of most supertype-mutated isolates were USA and Australia (Fig. 7A).  
277 Among emergent isolates, a strongly mutated isolate (Assembly database entry: "MT577016",  
278 297 mutations) from India stood out with 18 escape supermotifs corresponding to 7 superotypes.  
279 Notably, 16.4% of isolates, mostly showing only moderate mutational profiles ( $\geq 5$   
280 substitutions), presented  $\geq 0.5$  negated supermotifs per mutation. This feature suggests potential  
281 pressure for cytotoxic evasion by precise supermotif mutation in a subpopulation of isolates in  
282 the later cases. For instance, the MW586153 isolate collected in USA:SC showed 16  
283 substitutions where twelve of them removed supermotifs from four superotypes. Other  
284 remarkable cases were three isolates (MW702787, MW702788 and MW702806) from the same  
285 county in USA:CA that showed eleven escape supermotifs from seven superotypes with only  
286 fourteen substitutions, suggesting an incipient evasive lineage.

287 However, no isolates carried escape mutations for  $>15\%$  supermotifs of specific  
288 superotypes (Fig. 7B). The only exceptions were three USA isolates with  $<25$  mutations  
289 (including deletions) that invalidated four out of the twelve B\*27 supermotifs. Seventeen USA  
290 isolates with  $\leq 20$  substitutions and no indels invalidated up to three B\*27 supermotifs.

291

292 **Table 5. Top isolates showing supermotif escape mutations.**

| Accession | Total number of mutations | Number of escape supermotifs | Number of affected superotypes | Ratio escape supermotifs per mutation | Collection date | Country   |
|-----------|---------------------------|------------------------------|--------------------------------|---------------------------------------|-----------------|-----------|
| MW673525  | 40                        | 19                           | 5                              | 0.475                                 | 08/02/2021      | USA       |
| MT577016  | 297                       | 18                           | 7                              | 0.061                                 | 2020            | India     |
| MW694016  | 31                        | 15                           | 9                              | 0.484                                 | 11/02/2021      | USA       |
| MT451283  | 276                       | 14                           | 8                              | 0.051                                 | 24/03/2020      | Australia |

|          |     |    |   |       |            |           |
|----------|-----|----|---|-------|------------|-----------|
| MW156473 | 51  | 14 | 7 | 0.275 | 28/07/2020 | Australia |
| MT451279 | 142 | 13 | 8 | 0.092 | 24/03/2020 | Australia |
| MT451436 | 134 | 13 | 8 | 0.097 | 26/03/2020 | Australia |
| MW689154 | 62  | 13 | 7 | 0.210 | 13/02/2021 | USA       |
| MW653643 | 21  | 13 | 6 | 0.619 | 07/12/2020 | USA       |
| MW525102 | 27  | 13 | 4 | 0.481 | 10/01/2021 | USA       |
| MW406716 | 58  | 12 | 9 | 0.207 | 24/06/2020 | USA       |
| MW190139 | 49  | 12 | 8 | 0.245 | 16/07/2020 | USA       |
| MW228176 | 68  | 12 | 8 | 0.176 | 16/06/2020 | USA       |
| MW406699 | 62  | 12 | 8 | 0.194 | 24/06/2020 | USA       |
| MW542158 | 75  | 12 | 8 | 0.160 | 13/01/2021 | USA       |
| MW725850 | 27  | 12 | 8 | 0.444 | 24/02/2021 | USA       |
| MW449384 | 63  | 12 | 7 | 0.190 | 30/11/2020 | USA       |
| MW474268 | 54  | 12 | 7 | 0.222 | 12/11/2020 | USA       |
| MW617514 | 62  | 12 | 7 | 0.194 | 02/02/2021 | USA       |
| MW704295 | 50  | 12 | 7 | 0.240 | 19/01/2021 | Bahrain   |
| MW715548 | 71  | 12 | 7 | 0.169 | 19/02/2021 | USA       |
| MW673420 | 38  | 12 | 6 | 0.316 | 09/02/2021 | USA       |
| MW741583 | 26  | 12 | 6 | 0.462 | 23/02/2021 | USA       |
| MW751588 | 30  | 12 | 6 | 0.400 | 04/03/2021 | USA       |
| MW783199 | 68  | 12 | 6 | 0.176 | 02/03/2021 | USA       |
| MW518131 | 34  | 12 | 5 | 0.353 | 03/01/2021 | USA       |
| MW693032 | 18  | 12 | 5 | 0.667 | 05/11/2020 | USA       |
| MW586153 | 16  | 12 | 4 | 0.750 | 28/01/2021 | USA       |
| MW596067 | 32  | 12 | 4 | 0.375 | 29/01/2021 | USA       |
| MW673042 | 33  | 12 | 3 | 0.364 | 07/02/2021 | USA       |

293

#### 294 **Epitope escape mutations in families with scarce SARS-CoV-2 ligandomes**

295 In contrast to most supertypes, some alleles did not shown affinity to any SARS-CoV-2 peptide  
296 or showed scarce SARS-CoV-2 peptide repertoires. In this light, 246 alleles (8.4%) of the three  
297 loci (HLA-A: 39 alleles; HLA-B: 143 alleles; HLA-C: 64 alleles) were predicted to bind with  
298 high affinity to twenty or less epitopes. These alleles belonged to 48 families which showed  
299 three possible patterns depending on their alleles with few SARS-CoV-2 epitopes was either the  
300 norm or the exception (Fig. 8A). Firstly, eight families contained  $\geq 81\%$  of alleles with few  
301 predicted epitopes and  $\leq 22$  epitopes per allele on average, and were deemed poor SARS-CoV-  
302 2-repertoire families. These families were A\*74, B\*46, B\*52, B\*73, B\*82, B\*83, C\*01 and  
303 C\*18. Remarkably, the combination of alleles of inefficient families for the three loci, the  
304 A\*74:02-B\*46:01-C\*01:02 haplotype, has been detected with a 0.02% frequency in a Hong

305 Kong sample. Secondly, and in contrast, most families analyzed contained only <17% alleles  
306 linked to few epitopes and  $\geq 34$  epitopes per allele on average. However, three of these families  
307 (B\*08, B\*15 and C\*07) were large families that included  $\geq 10$  alleles with limited SARS-CoV-  
308 2 epitope sets. Finally, just two families behaved in a hybrid manner: B\*14 (18% alleles with  
309 few epitopes; 23.7 epitopes/allele) and B\*78 (43% alleles with few epitopes, 31.1  
310 epitopes/allele).

311 A small number of key viral changes may be sufficient to completely negate the  
312 contribution of these families, nearly devoid of SARS-CoV-2 ligands, to the cytotoxic  
313 protection. Substitutions and deletions (but no insertions) negated the binding of 42% and 37%  
314 epitopes (averaged by family), respectively, for weak alleles in the eight families with fewest  
315 alleles (Fig. 8B).

316 A pending issue is whether these SARS-CoV-2 isolates with changes that remove the  
317 HLA binding were collected from geographical zones with populations expressing these alleles.  
318 According to the Allele Frequency Database, the A\*74, B\*82 and C\*18 families were prevalent  
319 in Africa whereas B\*46 is common in Eastern Asia. These allele families were also common in  
320 minorities within these origins in other countries such as USA. By comparison, the B\*52, B\*73  
321 and C\*01 families were globally disseminated whereas B\*83 was extremely rare. When isolates  
322 carrying mutations were geographically mapped using sample metadata and superimposed onto  
323 allele distribution, co-localization was observed in several cases (Fig. 8C). For instance, nine  
324 isolates from Ghana and USA showed the K369D (N protein) change, which canceled the  
325 binding of the 361-KTFPPTEPK-369 of eight A\*74 alleles. Five isolates from Ghana and  
326 Kenya conveyed the ORF1ab deletion  $\Delta 6656-6744$  (corresponding to  $\Delta 204-292$  of nsp15\_A1),  
327 which erased the 6669-AMDEFIERY-6677 epitope of the A\*74:10 allele. Another example is  
328 constituted by nine isolates from India carrying the Q575R mutation in ORF1ab (Q395R in  
329 nsp2). This change invalidated binding to eight alleles of B\*52 family, being India one of the  
330 countries with population samples enriched in this family. Likewise, the  $\Delta 6342-6432$  deletion in  
331 ORF1ab ( $\Delta 417-507$  in nsp14A2) was found in 17 isolates collected in Ghana and negated the



332 6353-TPAFDKSAF-6361 epitope of the B\*82:03 allele. The deletion  $\Delta$ 872-966 (equivalent to  
333  $\Delta$ 54-148 of nsp3) of ORF1ab underwent by two Hong-Kong isolates erased the 906-  
334 YLFDESGEF-914 epitope associated to three B\*46 alleles. Finally, the M85Q (ORF1ab)  
335 substitution overrode five B\*46 alleles and was found in Bahrain and USA isolates.

336 Another intriguing question is whether independent changes destroying two epitopes  
337 bound to alleles of any of these family tend to accumulate in the same isolates. Although it was  
338 a rare event, isolates with mutations negating two epitopes were identified in five out of the  
339 eight poor SARS-CoV-2-ligandome families. These isolates reached 2.59% of the total carrying  
340 at least one mutation negating B\*52 epitopes. A prominent example is embodied by twenty-six  
341 isolates that combined alterations of ORF1ab  $\Delta$ 5828 (P504 in nsp13\_ZBD protein) and large  
342 deletions in the ORF1ab 6341-6436 range (416-511 in nsp14A2\_ExonN protein). These  
343 changes inactivated the 5827-NPAWRKAVF-5835 and 6353-TPAFDKSAF-6361 epitopes,  
344 respectively, of the B\*82:03 allele. These isolates were collected from 22/03/20 to 09/02/21, in  
345 six USA states with different percentages of Afro-American population, suggesting some  
346 maintained dissemination degree and potential convergent selective pressure. The fact that these  
347 changes were also detected in isolation in several samples from the same country (22 and 62  
348 isolates, respectively), indicates double mutants may have arisen by recombination.

349

## 350 **Discussion**

351 This study aims to determine to what extent the mutations observed in large SARS-CoV-2  
352 genome datasets can perturb the human cytotoxic response against this virus. This impact was  
353 studied in HLA class I molecules that practically cover the human population as a whole and,  
354 with special attention, to subsets with reduced SARS-CoV-2-ligand repertoires. In general,  
355 human and pathogen variability can greatly influence the CD8<sup>+</sup> response, which may affect the  
356 outcome of infection. Some combinations of HLA class I haplotypes and viral genomes appear  
357 to further offset the balance towards an insufficient cytotoxic response and, thus, a probable bad  
358 prognosis. The surveillance of escape viral variants carried out in this study might therefore help

359 to ameliorate enhanced susceptibility to COVID-19 in sub-populations by designing appropriate  
360 countermeasures.

361 The experimental evaluation of the immune response of every human allele associated  
362 to each viral variant is not feasible. Computational methods can facilitate this task and generate  
363 new, otherwise overlooked, hypotheses. Pioneering bioinformatic studies focused on predicting  
364 cytotoxic epitopes of a limited subset of common HLA alleles against the reference viral strain  
365 (13,20,23,26). However, SARS-CoV-2 has substantially evolved after more than a year of  
366 pandemic, resulting in a human-viral combination landscape of immense scale only  
367 approachable using automated techniques.

368 Bioinformatic approaches suffer from intrinsic limitations. These include the possible  
369 application of biologically inappropriate thresholds and potentially low predictive performance.  
370 Furthermore, alleles considered in algorithms as much as the priceless genome sampling by the  
371 worldwide sequencing effort still represent an underestimation of biological variability. Such  
372 obstacles were addressed in this study by: (i) utilizing an state-of-the-art algorithm that permits  
373 nearly universal fine-grained predictions (~3000 alleles); (ii) the application of stringent cutoffs  
374 that reflect the natural strictness of the ligand-HLA binding; (iii) the re-calculation of peptide  
375 binding affinity for each mutation; and (iv) the utilization of a large dataset of ~118,000 viral  
376 genomes and their corresponding metadata. Mutations were stratified by occurrence, reduction  
377 of HLA-binding affinity and geographical dissemination. Thus, the integration of omic data and  
378 immunoinformatics in this study very likely capture, despite drawbacks, the principal trends that  
379 respond to the posed questions.

380 Large epitope numbers were computationally predicted to be presented by most  
381 supertypes. Although all these supermotifs appeared mutated in at least one isolate, most of  
382 these mutations did not overcome the supermotif degeneracy. In most cases, the HLA binding  
383 affinity was reasonably maintained except from (i) residue substitutions in the second and C-  
384 terminal positions of the ligand core, amino acids that usually are anchor motifs; and (2) large  
385 deletions that fully removed the epitope. For instance, the Spike-W152C mutation and deletions  
386 in the 6342-6432 range in ORF1ab removed several epitopes at the level of supermotifs, and

387 were coupled to several other changes. Respect to the persistence of these escape mutations,  
388 point substitutions are likely less prone to impose a dramatic fitness although some extensive  
389 deletions have been also been shown to be compatible with infection and transmission (27,28).  
390 Large deletions have been related to progressive adaptation to host and reduced virulence  
391 (29,30), but their middle-term stability should be analyzed case-to-case.

392 A central question is whether escape mutations have longitudinally accumulated in  
393 genomes of individual isolates. If so, such emerging strains would have acquired, or be in the  
394 process of acquiring, enhanced capacity to infect individuals previously able to mount an  
395 effective cytotoxic response. However, the emergence of this challenging phenotype would not  
396 be expected after the examination of the genomic space of the virus carried out in this study.  
397 Even the forward line of mutated variants in this respect only combined low numbers (<15%) of  
398 escape supermotifs of a given supertype. The remaining intact supermotifs, other HLA class I  
399 loci and heterozygosity should compensate escape mutations, provided that the pool of naïve  
400 lymphocyte is high enough and the innate-to-adaptive response priming correctly coordinated.  
401 Notably, the humoral and CD4<sup>+</sup> responses would likely remain active and be sufficient in many  
402 cases. Therefore, we conclude that the systemic nature of the immune response translates into  
403 most healthy subjects remaining competent to respond against variants. The only exception that  
404 moderately threatens supertype redundancy was the B27 supertype with isolates that convey  
405 evading mutations for up to 33% of these supermotifs. This supertype is common in many  
406 populations such, in particular, in Eskimo (31), which may be exposed to "Northern America"  
407 isolates with disabled B27 supermotifs.

408 The emergence of isolates that undergo the step-wise accumulation of genetic markers  
409 to achieve extended cytotoxic resistance should not be ruled out. This may be favored by  
410 considering the explosive expansion of the virus worldwide. However, the mutational space  
411 would be reduced in practice due to potential antagonism between cytotoxic evasion pressure  
412 and structural-functional restrictions of proteins. However, a sizable fraction of the human  
413 population has been infected with the virus, which represents innumerable replication cycles  
414 and infection attempts. Some variants have been linked by other scientific groups to different

415 clinical phenotypes such as increased mortality (32) and antibody escape (33). Likewise,  
416 progressive mutation and recombination in SARS-CoV-2 may conceivably achieve a critical  
417 number of supermotif escape mutations that collectively constitute a selective advantage. Some  
418 identified isolates appeared to have experienced a higher-than-expected number of these  
419 changes over the genetic noise, and may have initiated the evasion-driven process.

420 On the other hand, according to our computational study, a worrisome scenario has  
421 already occurred for around ~10% of alleles able to bind a reduced number of ligands from the  
422 SARS-CoV-2 proteome. Among them, the A\*74, B\*82 and C\*18 allele families, with sub-  
423 Saharan African origin, and the C\*46 family, with Far East origin, excelled. Lost or debilitation  
424 of the cytotoxic response would make these individuals too dependent upon the humoral  
425 response, which can be inefficient during primary infection in some cases (1). This may be very  
426 relevant when these alleles are combined into the same haplotype, in particular when in  
427 homozygosis.

428 Underprotection may become exacerbated if these individuals become infected with  
429 these escape variants. Given their low epitope redundancy, a very few number of viral  
430 mutations, such as those identified in this study, may suffice to circumvent both the cytotoxic  
431 primary and memory T responses. The geographical co-existence of viral variants that  
432 experience epitope switch respect to some HLA class I molecules and individuals expressing  
433 these alleles may exert immediate selective pressure. This may cause rampant dissemination of  
434 emergent strains in these niches with local clinical consequences. Most isolates at great risk of  
435 achieving critical mutations to impair the CD8<sup>+</sup> ligand repertoires in these families were found  
436 in “Northern America” where some African Americans and Asian subpopulations carried these  
437 alleles. Whether these immunotypes with further diminished SARS-CoV-2 ligandomes have  
438 undergone positive selection warrants massive local HLA genotyping and viral sequencing.  
439 Some of these alleles may be ancestrally specialized in single pathogens, but unable to be  
440 effective against international viral infections as reported for Dengue (34), HIV (35) and  
441 influenza (36).

442 In conclusion, here we provide a complete repository of the predicted escape mutations  
443 in a recent NCBI genome sampling of SARS-CoV-2. Fortunately, accumulation of these  
444 mutations in single isolates does not appear close enough yet to be alarming at the global  
445 population level. However, isolates carrying mutations able to override limited CD8<sup>+</sup> response  
446 in some alleles and haplotypes are already co-circulating with individuals carrying these HLA  
447 class I molecules. Emerging SARS-CoV-2 variants may further increment the susceptibility of  
448 highly vulnerable communities and should be actively surveyed to coordinate appropriate  
449 countermeasures. In this respect, bioinformatic pipelines operating on a timely basis may play  
450 an irreplaceable role in the protection against this and other pandemic threats.

451

## 452 **Materials and Methods**

### 453 **Data acquisition**

454 SARS-CoV-2 coding sequences and isolate metadata were downloaded from the NCBI  
455 repository (Last accession: 19/03/2021) (37). Protein sequences of clinical isolates showing  
456 length differences >3% respect to the reference variant were considered anomalous and rejected.  
457 The country of origin of isolates were assigned to sub-continental regions following the M49  
458 United Nation geoscheme. Experimental epitopes were downloaded from the IEDB (Last  
459 accession: 19/03/2021)(16) using the following search terms: Epitopes: "Any epitopes"; Assay:  
460 "T Cell", "MHC Ligand" and outcome: "Positive"; MHC Restriction: "MHC Class I"; Host:  
461 "Human"; Disease "COVID-19 (ID: DOID: 0080600)".

462 Alleles for the twelve HLA class I supertypes were acquired from the original  
463 publication (12).

464 Geographical localization of populations with allele families with few epitopes was  
465 carried out using the Allele Frequency Net Database (38). Only samples with at least 50  
466 individuals and  $\geq 1\%$  frequency for the given allele family were considered.

467

### 468 **HLA class I epitope prediction and analysis**

469 HLA class I epitopes between 8-12 residues in 11 viral proteins, and the ORF1ab polyprotein,  
470 of the SARS-CoV-2 reference proteome (Wuhan-1; RefSeq: NC\_045512.2) were predicted for  
471 2,915 alleles using NetMHCipan EL 4.1 (22). Binding epitopes were considered those that  
472 satisfy the rank  $\leq 0.5$  (EL rank) and score (EL score)  $\geq 0.5$  estimations provided by this neural  
473 network method. The predictive performance of this algorithm was superior when trained with  
474 mass spectrometry elution (EL) data than when trained with binding affinity (BA) data and  
475 therefore the former is recommended by the developers for general applications. However, the  
476 "EL score" quantifies biologically meaningless abstract units whereas the score of the BA  
477 version "BA score" reflects the IC50 in nM. Thus, to take advantage of the strengths of both  
478 strategies, the approximate equivalences between EL and BA scores were assessed by  
479 exponential regression ( $r^2=0.69$ ) (Supplementary Fig. S1). This comparison resulted in a value  
480 for "EL score"  $\geq 0.5$  was roughly equivalent to an IC50  $\leq 500$ nM. This affinity threshold is  
481 satisfied by most medium to high-affinity real ligands (39). Redundant epitopes with distinct  
482 lengths and lower "EL scores" but sharing the same peptide core and allele were ignored.

483 Intra-family coherence was calculated by comparing the non-redundant epitope pools  
484 between all alleles of the same family and calculate the average Jaccard coefficient (intersection  
485 divided by the union) of all families. For that, the intersection was constituted by the number of  
486 epitopes that showed a perfect coordinate match for two alleles among all epitopes identified by  
487 each allele. Inter-family epitope correlation was calculated by comparing family epitope pools,  
488 i.e. those shared by at least half of the alleles of the alleles in the family, like explained above  
489 between families. A matrix with all inter-family Jaccard coefficients was used for agglomerative  
490 hierarchical clustering by *clustermap* function of *seaborn* data visualization Python library with  
491 default options.

492 Supermotifs, or supertype-associated epitopes, were those predicted as non-redundant  
493 epitopes showing perfect coordinates for  $\geq 50\%$  alleles in the supertype (12). Only alleles which  
494 motifs were experimentally established or shared exact match(es) to second and C-terminal  
495 peptide positions, i.e. B and F pockets of the HLA class I groove, in the original reference were  
496 considered.

497

## 498 **Mutation analyses**

499 Mutations respect to the proteins of the reference Wuhan-1 strain (RefSeq: NC\_045512.2) were  
500 identified by aligning with Clustal Omega 1.2.1 (40) with an in-house perl script. All adjacent  
501 insertion or deletion runs were collapsed into single events. Non-conservative mutations were  
502 deemed those involving distinct physicochemical classes: acidic (D, E), amide (N, Q), basic (H,  
503 K, R), cysteine (C), glycine (G), hydroxyl (S, T), hydrophobic aliphatic (A, I, L, M, V),  
504 hydrophobic aromatic (F, W, Y) and proline (P) residues.

505         The impact of point substitutions on epitope binding was assessed by recalculating the  
506 "EL score" and "El rank" of the mutated peptide. For insertions, flanking regions to the insertion  
507 limits were taken to complete 22mer sections and binding also recalculated. Likewise, for  
508 deletions, the resulting 11mers flanking the deletion limits were merged into 22mer sections.  
509 Based on the "BA score" and "EL score" correspondences, "EL scores" of < 0.1 roughly  
510 corresponded to BA scores of >5000nM (Supplementary Fig. S1), associated to non-binders  
511 according to the IEDB curators. Thus, mutations causing medium-strong peptide binders  
512 decreases to EL scores < 0.1 besides EL rank  $\geq 1$  were deemed epitope escape mutations. For  
513 supermotif escape mutations, the allele of the supermotif showing the highest "EL score" for the  
514 wild-type epitope was tested. For the eight families with fewest epitopes, escape mutations were  
515 calculated for each allele.

516         Network graphs of coupled mutations were carried out using the NetworkX (41) Python  
517 library.

518

## 519 **Funding**

520 This research was supported by Acción Estratégica en Salud from the ISCIII  
521 (<https://www.isciii.es>), grants MPY 380/18 (to MJM), 388/18 (to DL) and 509/19 (to AJM-G).  
522 AJM-G is the recipient of a Miguel Servet contract by the ISCIII. The funders had no role in  
523 study design, data collection and analysis, decision to publish, or preparation of the manuscript.

524

## 525 **Author Contributions**

526 **Conceptualization:** Daniel López, Michael J. McConnell, Antonio J. Martín-Galiano.

527 **Data curation:** Anna Foix, Antonio J. Martín-Galiano.

528 **Formal analysis:** Anna Foix, Antonio J. Martín-Galiano.

529 **Funding acquisition:** Daniel López, Michael J. McConnell, Antonio J. Martín-Galiano.

530 **Investigation:** Anna Foix, Daniel López, Michael J. McConnell, Antonio J. Martín-Galiano.

531 **Methodology:** Anna Foix, Antonio J. Martín-Galiano.

532 **Project administration:** Antonio J. Martín-Galiano.

533 **Resources:** Antonio J. Martín-Galiano.

534 **Software:** Anna Foix, Antonio J. Martín-Galiano.

535 **Supervision:** Daniel López, Michael J. McConnell, Antonio J. Martín-Galiano.

536 **Validation:** Antonio J. Martín-Galiano.

537 **Visualization:** Anna Foix, Antonio J. Martín-Galiano.

538 **Writing—original draft:** Antonio J. Martín-Galiano.

539 **Writing—review & editing:** Daniel López, Michael J. McConnell, Antonio J. Martín-Galiano.

540

## 541 **References**

542 1. Rydzynski Moderbacher C, Ramirez SI, Dan JM, Grifoni A, Hastie KM, Weiskopf D, et  
543 al. Antigen-Specific Adaptive Immunity to SARS-CoV-2 in Acute COVID-19 and  
544 Associations with Age and Disease Severity. *Cell*. 2020 Nov 12;183(4):996-1012.e19.

545 2. Liu L, Wang P, Nair MS, Yu J, Rapp M, Wang Q, et al. Potent neutralizing antibodies  
546 against multiple epitopes on SARS-CoV-2 spike. *Nature*. 2020 Aug;584(7821):450–6.

547 3. Sette A, Crotty S. Adaptive immunity to SARS-CoV-2 and COVID-19. *Cell*. 2021 Jan 12;

548 4. Hellerstein M. What are the roles of antibodies versus a durable, high quality T-cell  
549 response in protective immunity against SARS-CoV-2? *Vaccine X*. 2020 Dec  
550 11;6:100076.

551 5. Liu L, Wei Q, Lin Q, Fang J, Wang H, Kwok H, et al. Anti-spike IgG causes severe acute  
552 lung injury by skewing macrophage responses during acute SARS-CoV infection. *JCI*  
553 *Insight*. 2019 Feb 21;4(4).



- 554 6. Tang F, Quan Y, Xin Z-T, Wrammert J, Ma M-J, Lv H, et al. Lack of peripheral memory  
555 B cell responses in recovered patients with severe acute respiratory syndrome: a six-year  
556 follow-up study. *J Immunol Baltim Md 1950*. 2011 Jun 15;186(12):7264–8.
- 557 7. Le Bert N, Tan AT, Kunasegaran K, Tham CYL, Hafezi M, Chia A, et al. SARS-CoV-2-  
558 specific T cell immunity in cases of COVID-19 and SARS, and uninfected controls.  
559 *Nature*. 2020 Aug;584(7821):457–62.
- 560 8. Dan JM, Mateus J, Kato Y, Hastie KM, Yu ED, Faliti CE, et al. Immunological memory to  
561 SARS-CoV-2 assessed for up to 8 months after infection. *Science*. 2021 Feb  
562 5;371(6529).
- 563 9. Schulien I, Kemming J, Oberhardt V, Wild K, Seidel LM, Killmer S, et al.  
564 Characterization of pre-existing and induced SARS-CoV-2-specific CD8(+) T cells. *Nat*  
565 *Med*. 2021 Jan;27(1):78–85.
- 566 10. Mudatsir M, Fajar JK, Wulandari L, Soegiarto G, Ilmawan M, Purnamasari Y, et al.  
567 Predictors of COVID-19 severity: a systematic review and meta-analysis. *F1000Research*.  
568 2020;9:1107.
- 569 11. Robinson J, Barker DJ, Georgiou X, Cooper MA, Flicek P, Marsh SGE. IPD-IMGT/HLA  
570 Database. *Nucleic Acids Res*. 2020 Jan 8;48(D1):D948–55.
- 571 12. Sidney J, Peters B, Frahm N, Brander C, Sette A. HLA class I supertypes: a revised and  
572 updated classification. *BMC Immunol*. 2008 Jan 22;9:1.
- 573 13. Nelde A, Bilich T, Heitmann JS, Maringer Y, Salih HR, Roerden M, et al. SARS-CoV-2-  
574 derived peptides define heterologous and COVID-19-induced T cell recognition. *Nat*  
575 *Immunol*. 2021 Jan;22(1):74–85.
- 576 14. Kiyotani K, Toyoshima Y, Nemoto K, Nakamura Y. Bioinformatic prediction of potential  
577 T cell epitopes for SARS-Cov-2. *J Hum Genet*. 2020 Jul;65(7):569–75.
- 578 15. Peng Y, Mentzer AJ, Liu G, Yao X, Yin Z, Dong D, et al. Broad and strong memory  
579 CD4(+) and CD8(+) T cells induced by SARS-CoV-2 in UK convalescent individuals  
580 following COVID-19. *Nat Immunol*. 2020 Nov;21(11):1336–45.
- 581 16. Vita R, Mahajan S, Overton JA, Dhanda SK, Martini S, Cantrell JR, et al. The Immune  
582 Epitope Database (IEDB): 2018 update. *Nucleic Acids Res*. 2019 Jan 8;47(D1):D339–43.
- 583 17. Correale P, Mutti L, Pentimalli F, Baglio G, Saladino RE, Sileri P, et al. HLA-B\*44 and  
584 C\*01 Prevalence Correlates with Covid19 Spreading across Italy. *Int J Mol Sci*. 2020 Jul  
585 23;21(15).
- 586 18. Wang W, Zhang W, Zhang J, He J, Zhu F. Distribution of HLA allele frequencies in 82  
587 Chinese individuals with coronavirus disease-2019 (COVID-19). *HLA*. 2020  
588 Aug;96(2):194–6.
- 589 19. Harjanto S, Ng LFP, Tong JC. Clustering HLA class I superfamilies using structural  
590 interaction patterns. *PLoS One*. 2014;9(1):e86655.
- 591 20. Nguyen A, David JK, Maden SK, Wood MA, Weeder BR, Nellore A, et al. Human  
592 Leukocyte Antigen Susceptibility Map for Severe Acute Respiratory Syndrome  
593 Coronavirus 2. *J Virol*. 2020 Jun 16;94(13).

- 594 21. Du VY, Bansal A, Carlson J, Salazar-Gonzalez JF, Salazar MG, Ladell K, et al. HIV-1-  
595 Specific CD8 T Cells Exhibit Limited Cross-Reactivity during Acute Infection. *J Immunol*  
596 *Baltim Md* 1950. 2016 Apr 15;196(8):3276–86.
- 597 22. Reynisson B, Alvarez B, Paul S, Peters B, Nielsen M. NetMHCpan-4.1 and  
598 NetMHCIIpan-4.0: improved predictions of MHC antigen presentation by concurrent  
599 motif deconvolution and integration of MS MHC eluted ligand data. *Nucleic Acids Res.*  
600 2020 Jul 2;48(W1):W449–54.
- 601 23. Tarke A, Sidney J, Kidd CK, Dan JM, Ramirez SI, Yu ED, et al. Comprehensive analysis  
602 of T cell immunodominance and immunoprevalence of SARS-CoV-2 epitopes in COVID-  
603 19 cases. *Cell Rep Med.* 2021 Feb 16;2(2):100204.
- 604 24. Sette A, Sidney J. HLA supertypes and supermotifs: a functional perspective on HLA  
605 polymorphism. *Curr Opin Immunol.* 1998 Aug;10(4):478–82.
- 606 25. Rousseau CM, Daniels MG, Carlson JM, Kadie C, Crawford H, Prendergast A, et al. HLA  
607 class I-driven evolution of human immunodeficiency virus type 1 subtype c proteome:  
608 immune escape and viral load. *J Virol.* 2008 Jul;82(13):6434–46.
- 609 26. Grifoni A, Sidney J, Zhang Y, Scheuermann RH, Peters B, Sette A. A Sequence  
610 Homology and Bioinformatic Approach Can Predict Candidate Targets for Immune  
611 Responses to SARS-CoV-2. *Cell Host Microbe.* 2020 Apr 8;27(4):671-680.e2.
- 612 27. Lam J-Y, Yuen C-K, Ip JD, Wong W-M, To KK-W, Yuen K-Y, et al. Loss of orf3b in the  
613 circulating SARS-CoV-2 strains. *Emerg Microbes Infect.* 2020 Dec;9(1):2685–96.
- 614 28. Su YCF, Anderson DE, Young BE, Linster M, Zhu F, Jayakumar J, et al. Discovery and  
615 Genomic Characterization of a 382-Nucleotide Deletion in ORF7b and ORF8 during the  
616 Early Evolution of SARS-CoV-2. *mBio.* 2020 Jul 21;11(4).
- 617 29. Benedetti F, Pachetti M, Marini B, Ippodrino R, Ciccozzi M, Zella D. SARS-CoV-2:  
618 March toward adaptation. *J Med Virol.* 2020 Nov;92(11):2274–6.
- 619 30. Peacock TP, Penrice-Randal R, Hiscox JA, Barclay WS. SARS-CoV-2 one year on:  
620 evidence for ongoing viral adaptation. *J Gen Virol.* 2021 Apr;102(4).
- 621 31. Peschken CA, Esdaile JM. Rheumatic diseases in North America's indigenous peoples.  
622 *Semin Arthritis Rheum.* 1999 Jun;28(6):368–91.
- 623 32. Toyoshima Y, Nemoto K, Matsumoto S, Nakamura Y, Kiyotani K. SARS-CoV-2  
624 genomic variations associated with mortality rate of COVID-19. *J Hum Genet.* 2020  
625 Dec;65(12):1075–82.
- 626 33. McCarthy KR, Rennick LJ, Nambulli S, Robinson-McCarthy LR, Bain WG, Haidar G, et  
627 al. Recurrent deletions in the SARS-CoV-2 spike glycoprotein drive antibody escape.  
628 *Science.* 2021 Mar 12;371(6534):1139–42.
- 629 34. Vejbaesya S, Thongpradit R, Kalayanarooj S, Luangtrakool K, Luangtrakool P, Gibbons  
630 RV, et al. HLA Class I Supertype Associations With Clinical Outcome of Secondary  
631 Dengue Virus Infections in Ethnic Thais. *J Infect Dis.* 2015 Sep 15;212(6):939–47.
- 632 35. Li S, Jiao H, Yu X, Strong AJ, Shao Y, Sun Y, et al. Human leukocyte antigen class I and  
633 class II allele frequencies and HIV-1 infection associations in a Chinese cohort. *J Acquir*  
634 *Immune Defic Syndr* 1999. 2007 Feb 1;44(2):121–31.

- 635 36. Falfán-Valencia R, Narayanankutty A, Reséndiz-Hernández JM, Pérez-Rubio G, Ramírez-  
636 Venegas A, Nava-Quiroz KJ, et al. An Increased Frequency in HLA Class I Alleles and  
637 Haplotypes Suggests Genetic Susceptibility to Influenza A (H1N1) 2009 Pandemic: A  
638 Case-Control Study. *J Immunol Res*. 2018;2018:3174868.
- 639 37. Database resources of the National Center for Biotechnology Information. *Nucleic Acids*  
640 *Res*. 2018 Jan 4;46(D1):D8–13.
- 641 38. Gonzalez-Galarza FF, McCabe A, Santos EJMD, Jones J, Takeshita L, Ortega-Rivera ND,  
642 et al. Allele frequency net database (AFND) 2020 update: gold-standard data  
643 classification, open access genotype data and new query tools. *Nucleic Acids Res*. 2020  
644 Jan 8;48(D1):D783–8.
- 645 39. Lundegaard C, Lamberth K, Harndahl M, Buus S, Lund O, Nielsen M. NetMHC-3.0:  
646 accurate web accessible predictions of human, mouse and monkey MHC class I affinities  
647 for peptides of length 8-11. *Nucleic Acids Res*. 2008 Jul 1;36(Web Server issue):W509-  
648 512.
- 649 40. Sievers F, Higgins DG. Clustal Omega for making accurate alignments of many protein  
650 sequences. *Protein Sci Publ Protein Soc*. 2018 Jan;27(1):135–45.
- 651 41. Aric A, Schult DA, Swart PJ. “Exploring network structure, dynamics, and function using  
652 NetworkX” in *Proceedings of the 7th Python in Science Conference (SciPy2008)*.  
653 Pasadena, CA USA: Gäel Varoquaux, Travis Vaught, and Jarrod Millman; 2008. 11–15 p.

654

## 655 **SUPPORTING INFORMATION CAPTIONS**

656 Figure S1. Correspondence between netMHCpan 4.1 EL and BA scores.

657 Table S1. Intra-family conserved epitopes.

658 Table S2. Supertype-associated epitopes.

659 Table S3. Supermotif escape substitutions.

660 Table S4. Supermotif escape deletions.

661 Table S5. Isolates carrying escape mutations for five or more supermotifs.

662 Table S6. Escape substitutions for allele families with few epitopes.

663 Table S7. Escape deletions for allele families with few epitopes.

664

665

## LEGENDS TO FIGURES

666 **Fig 1. Number and degree of overlap between SARS-CoV-2 epitopes for different HLA-**

667 **class I allelic families. (A)** Average number of predicted HLA class I epitopes by allele family

668 and protein. The standard deviation resulting from all proteins is indicated as a single error bar.

669 **(B)** Hierarchical clustering and associated heatmap indicating the degree of inter-family epitope

670 correlation. Color intensity expresses the Jaccard index for the epitope intersection between all

671 family pairs. Perfect location match between epitopes calculated by netMHCipan 4.1 EL with

672 score  $\geq 0.5$  and rank  $\leq 0.5$  were utilized to calculate intersection and union. Intra-family

673 conserved epitopes ( $\geq 50\%$  alleles in the family by exact match) are in Supplementary Table S1.

674

675 **Fig 2. Comparison between predicted and validated epitopes. (A)** Number of predicted

676 epitopes (score  $\geq 0.5$  and rank  $\leq 0.5$ ) versus validated epitopes per allele. **(B)** Heatmap showing

677 the family average score (any score, rank  $\leq 2$ ) for validated HLA class I epitopes. Predicted

678 epitopes with perfect matches with validated epitopes stored in the IEDB are indicated in

679 Supplementary Table S1.

680

681 **Fig 3. SARS-CoV-2 supermotifs. (A)** Distribution of supermotifs according to the number of

682 supertypes covered. **(B)** Number of supermotifs per supertype detailed by protein antigen.

683

684 **Fig 4. Global mutation analysis in NCBI SARS-CoV-2 genomes. (A)** Proportion of

685 cumulative and unique residue mutation events in SARS-CoV-2. **(B)** Length distribution of

686 insertions (left) and deletions (right). **(C)** Number of isolates and number of epitopes which

687 location overlap to substitutions (left), insertions (center) and deletions (right).

688

689 **Fig 5. Supermotif escape mutations. (A)** Influence of supermotif core position and residue

690 conservation in the epitope escape capacity of substitutions. **(B)** Average percentage of escape

691 supermotifs by any mutation type after incremental filter application. **(C)** Absolute number of

692 mutated supermotifs for each supertype after incremental filter application. **(D)** Nightingale rose

693 charts indicating the percentage of escape supermotifs in prevalent M49 zones. Only mutations  
694 involving  $\geq 2$  isolates in the M49 were considered. Only M49 zones with  $\geq 5\%$  escape  
695 supermotifs for at least one supertype are shown.

696

697 **Fig 6. Networks of coupled supermotif escape mutations.** Undirected unweighted graphs  
698 showing coupled supermotif escape mutations. Sub-networks are named with roman numbers.  
699 Nodes correspond to mutations that were substitutions (position and residue change) or  
700 deletions (residue range). No coupled insertions were detected. The node color indicates the  
701 antigen protein. The sphere diameter reflects the amount of isolates harboring the mutation.  
702 Nodes represent mutations carried by  $\geq 25$  isolates. Edges represent co-existence of a mutation  
703 pair in  $\geq 20\%$  isolates of all those carrying at least one of the mutations.

704

705 **Fig 7. Isolates carrying different combinations of escape mutations.** (A) Each point  
706 represents an isolate plotted according to the total number of mutations, the number of escape  
707 supermotifs and number of affected supertypes. Only isolates harboring three or more escape  
708 supermotifs are represented. (B) Chart panel indicating mutated isolates according to the  
709 number of escape supermotifs for each supertype. Isolates are colored by M49 zone of  
710 collection.

711

712 **Fig 8. Escape mutations in allele families with fewest epitopes.** (A) Number of alleles with  $\leq$   
713 20 epitopes versus the total number of alleles for HLA families of the three loci. Families  
714 without any allele with  $\leq 20$  epitopes are not represented. (B) Average number of escape  
715 epitopes, either by substitutions or deletions, respect to the average total number of epitopes for  
716 the eight allele families with the fewest epitopes. (C) World map panel indicating the presence  
717 of population samples carrying alleles of the eight families with fewest epitopes and isolates  
718 with escape mutations for these families. Family allele frequencies are color ranked for both the  
719 majority population (red scale) and sub-population (blue scale) samples. Only the highest  
720 frequency sample per country was considered. B\*83 data is not shown due to its extremely low

721 prevalence. Spheres in green indicate the presence of isolates with escape mutations for the  
722 allele family collected in that country. The sphere diameter is proportional to the total number of  
723 these isolates. Epitope escape substitutions and deletions for the eight allele family with fewest  
724 epitopes are listed on Supplementary Tables S6 and S7, respectively.

725

**A**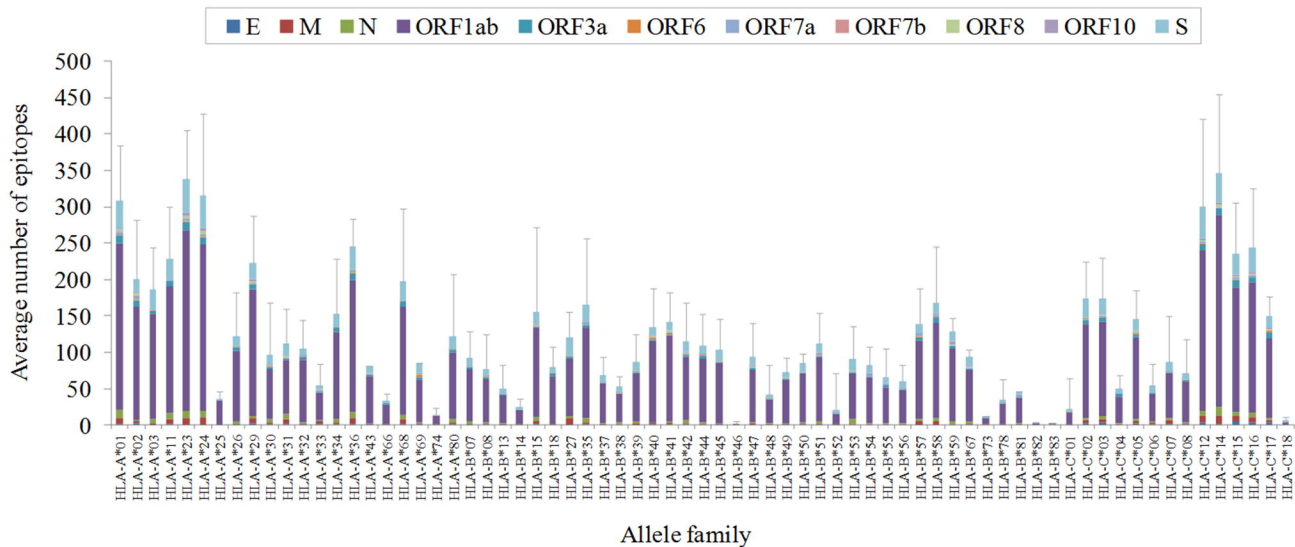

Allele family

**B**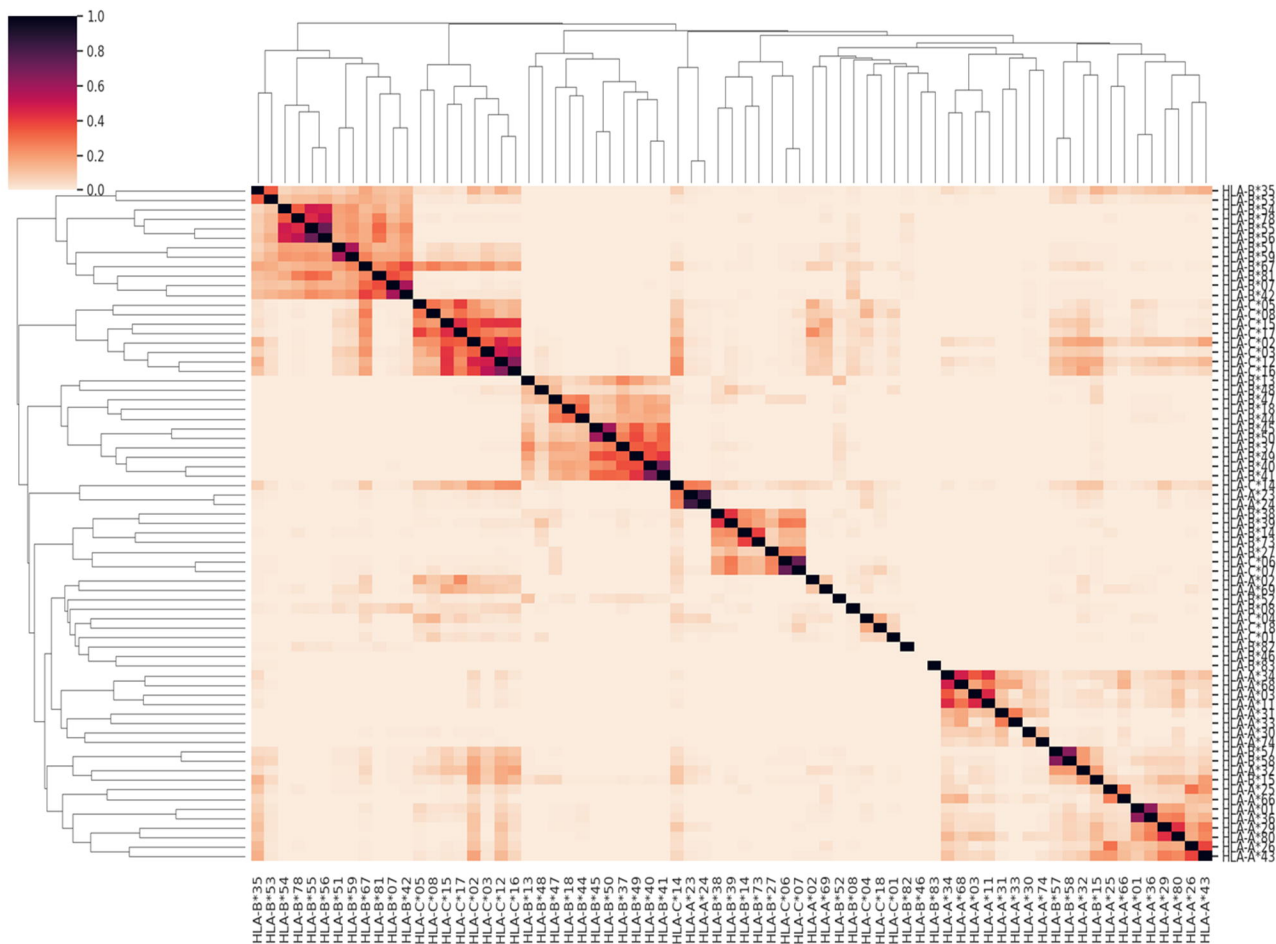



**A**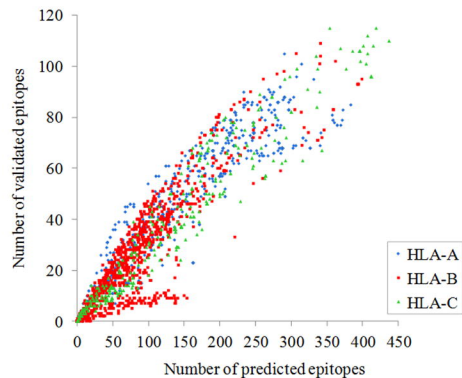**B**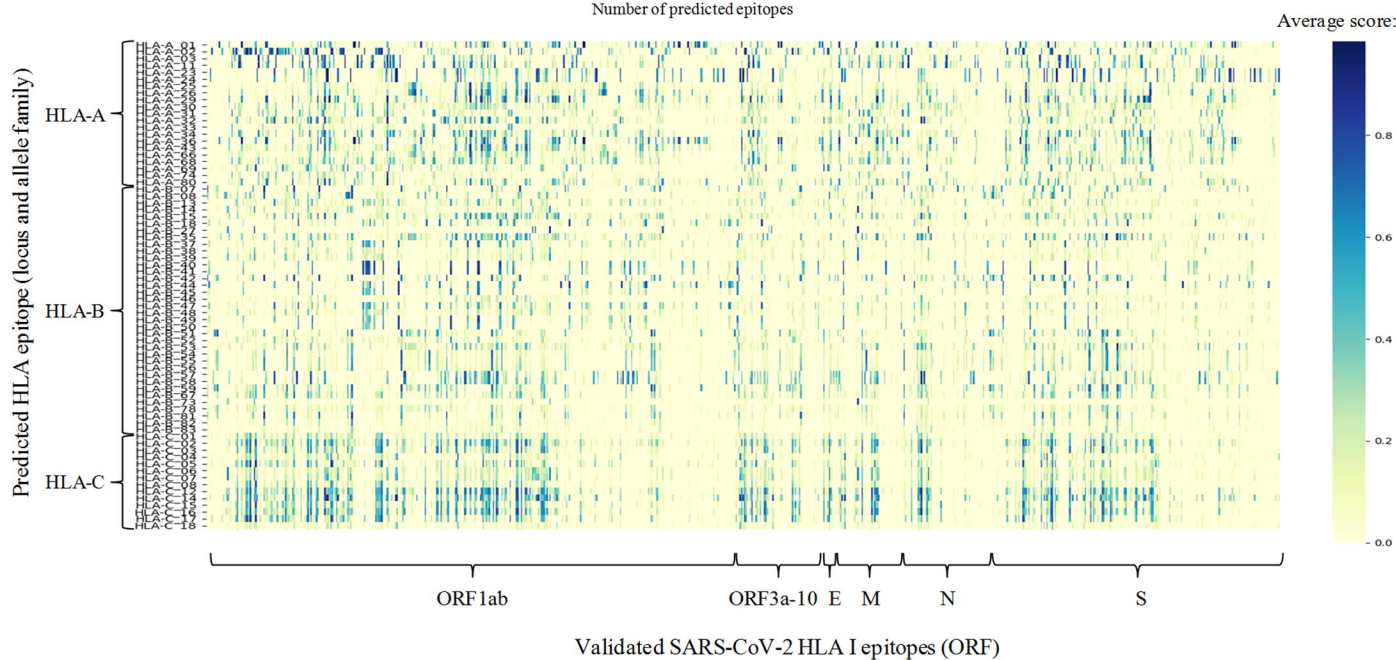



**A**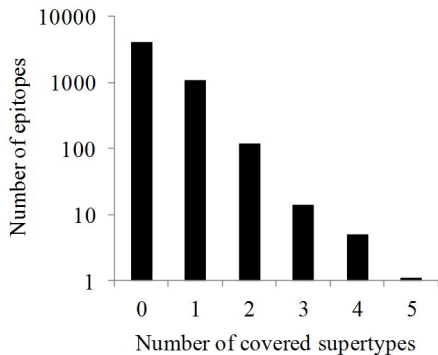**B**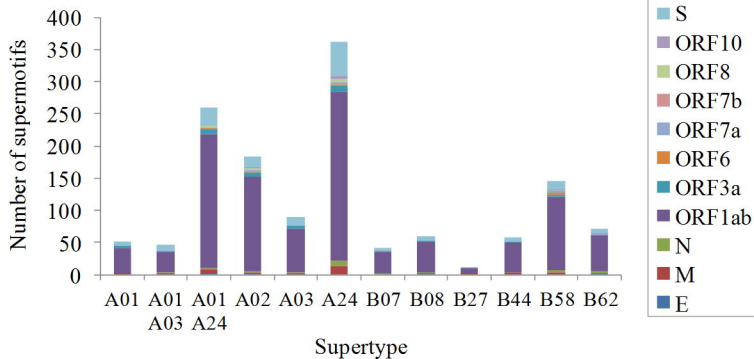

**A**Cumulative:  
(all events)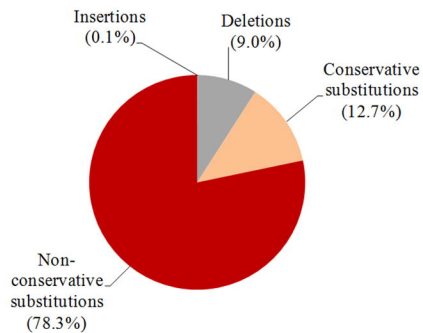

Unique:

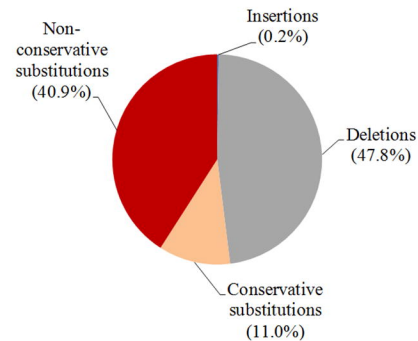**B**

Insertions:

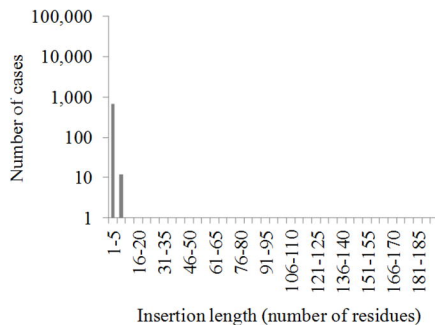

Deletions:

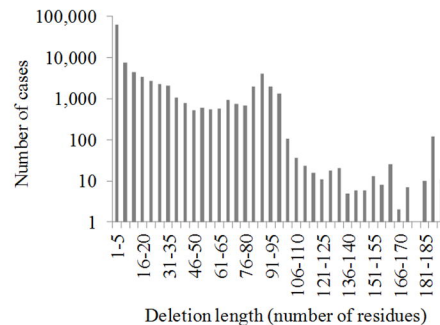**C**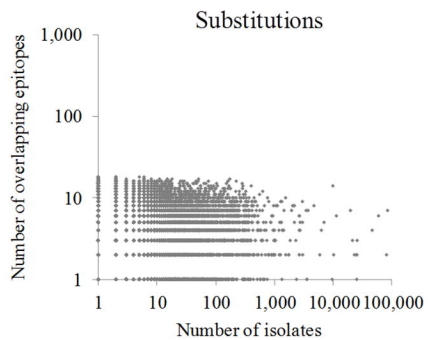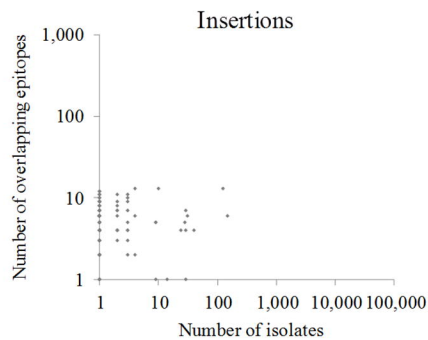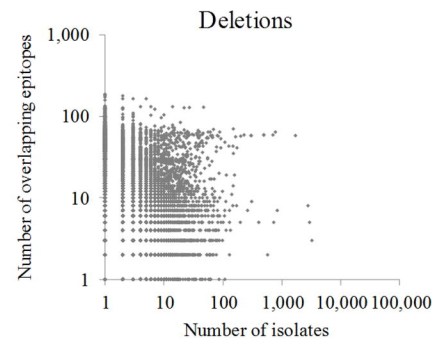

**A**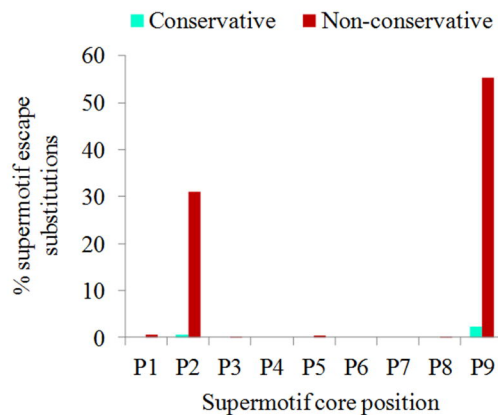**B**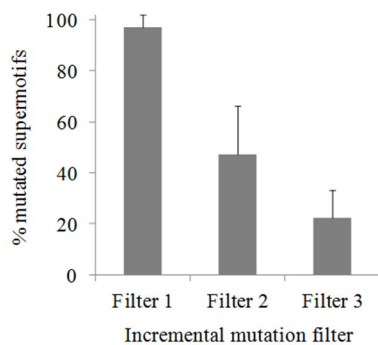**C**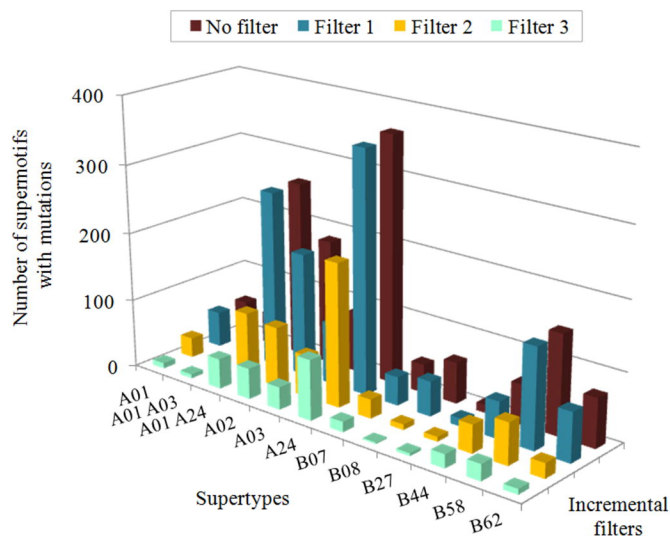**D**

Australia and New Zealand

Northern America

Southern Asia

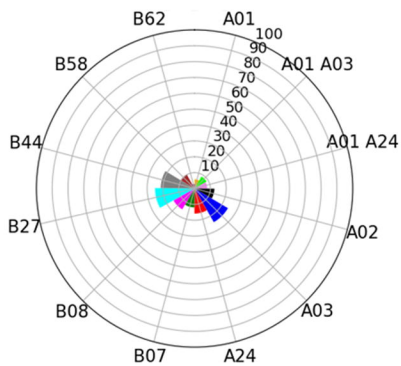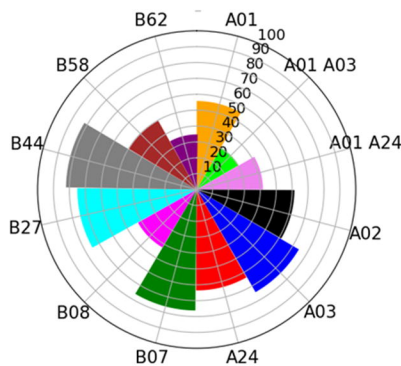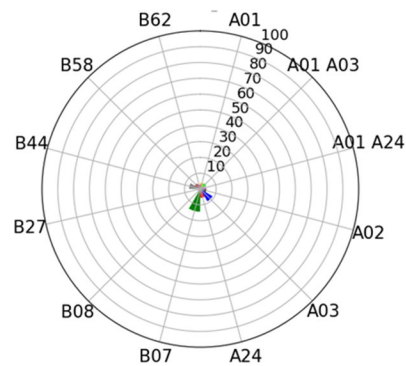

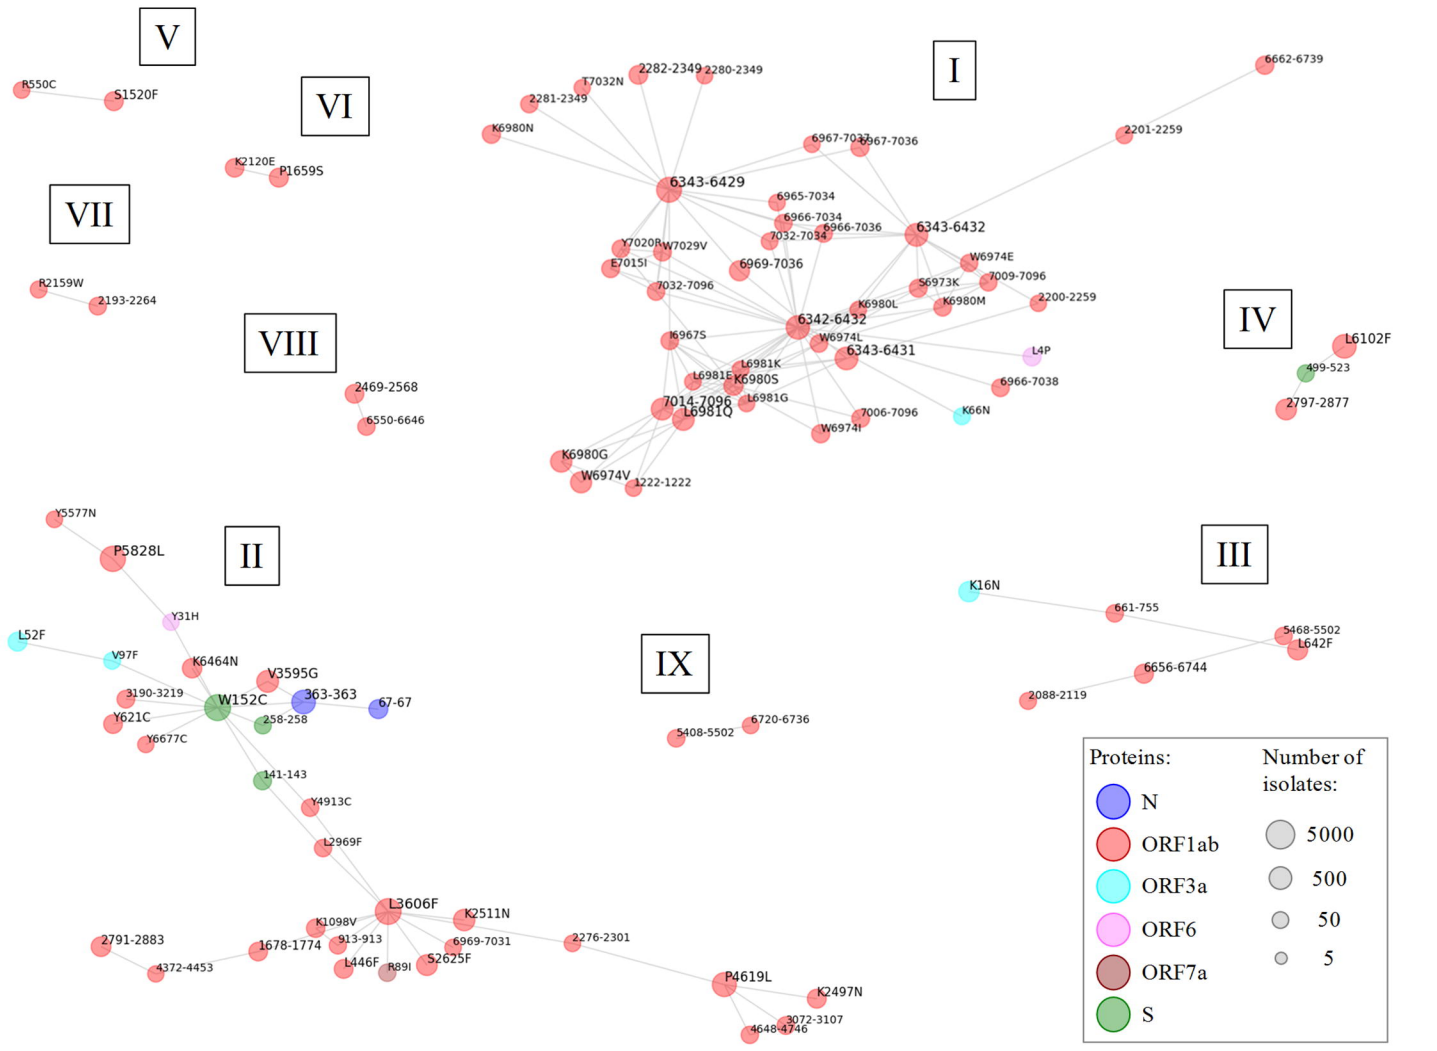

**A**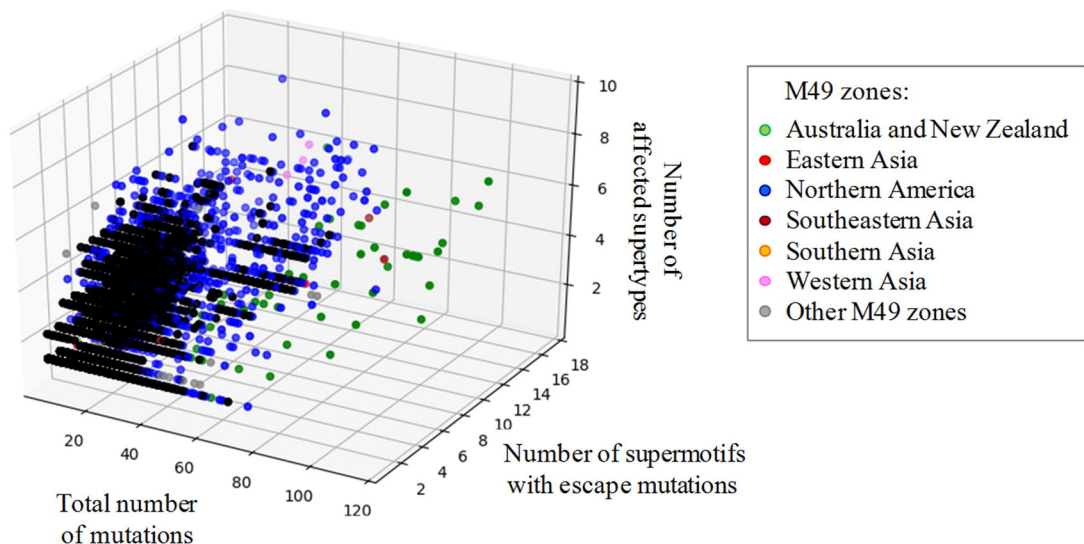**B**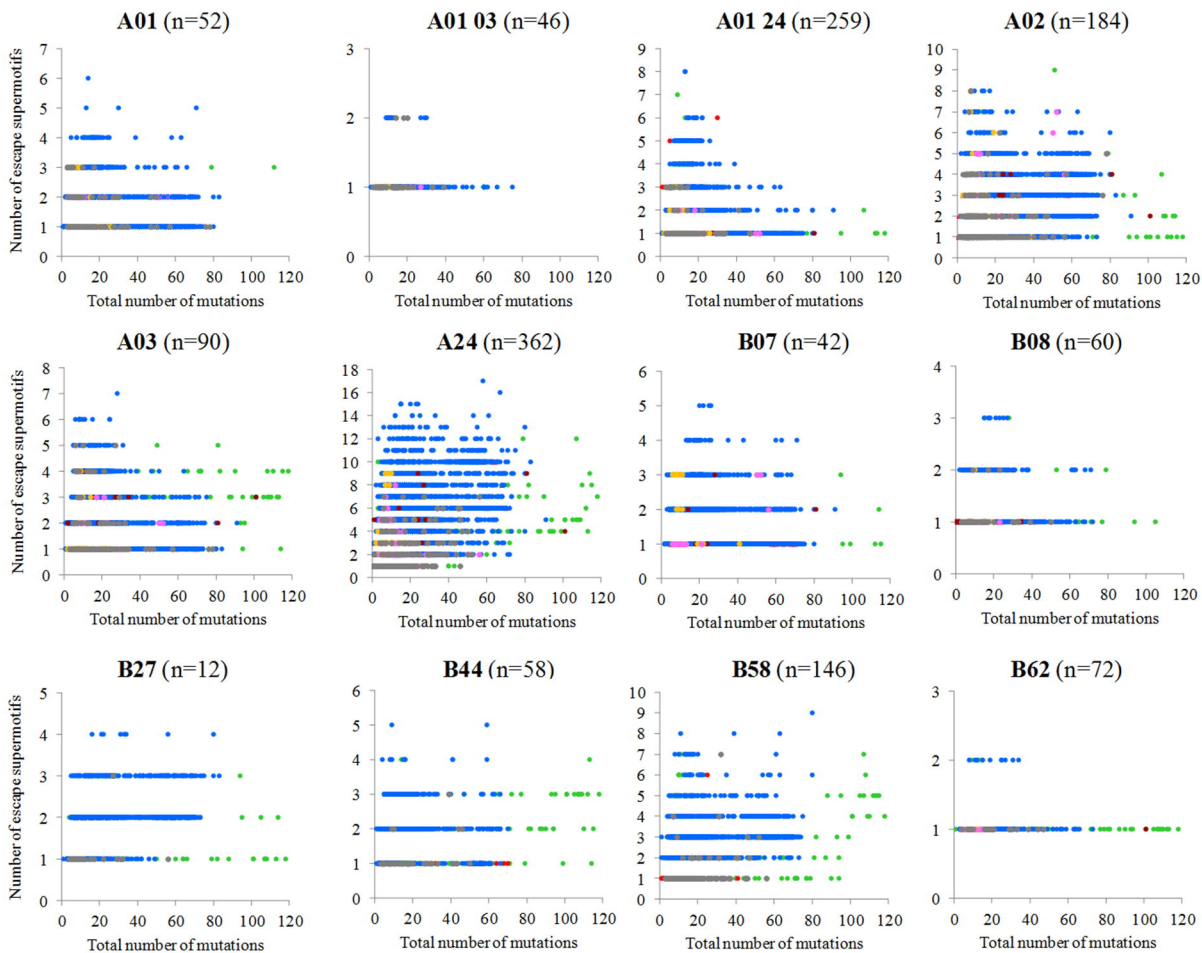

**A**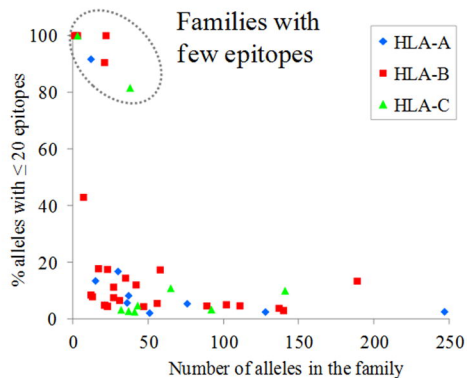**B**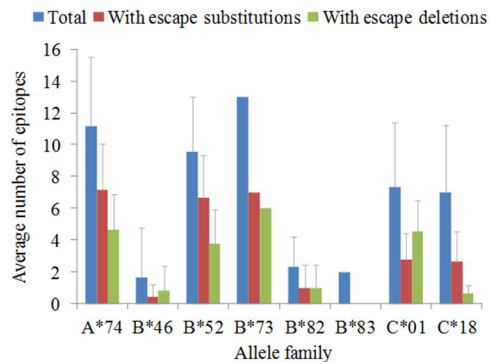**C**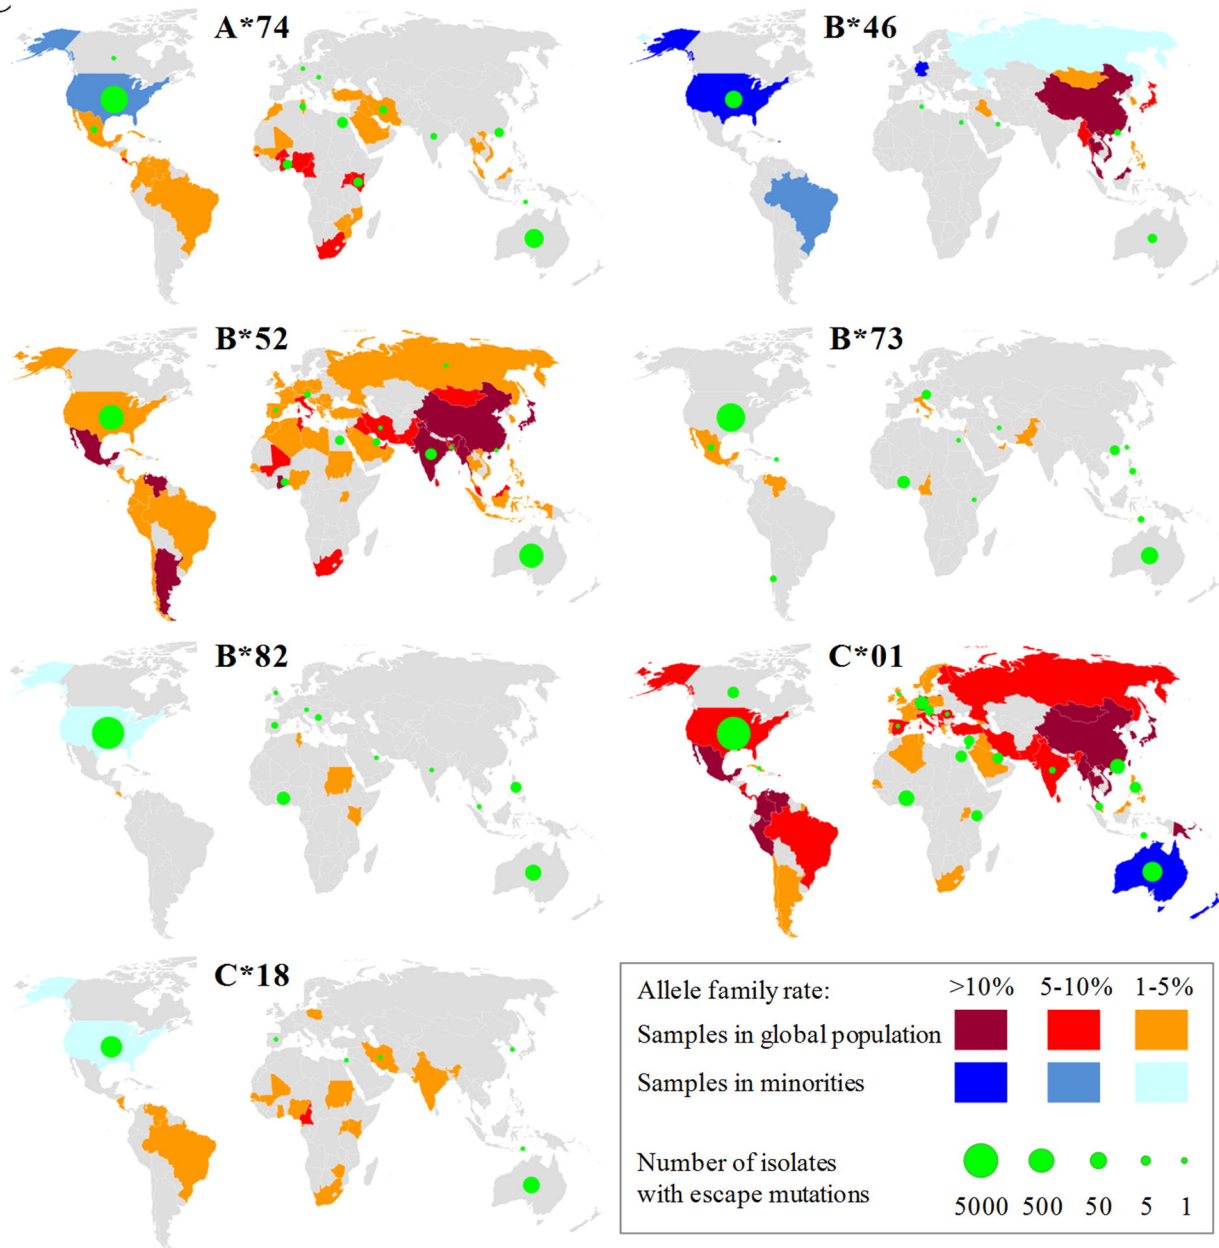

Source: https://biorxiv.org/content/10.1101/2021.07.04.451040v1.full.pdf
